# Supplementary material for: In silico identification of off-target pesticidal dsRNA binding in honey bees (Apis mellifera)
Source: PeerJ. 2017 Dec 13;5:e4131. doi: 10.7717/peerj.4131 (PMC5732542; doi:10.7717/peerj.4131)
Supplement: Data S1 — The necessary information for rerunning all of our analyses in this paper. [file peerj-05-4131-s001.xls]

## Sheet: Off-target RNAi database
ID	reference	Target Species Class	Order	Family	Species	target gene	nt	dsRNA sequence				Comments	21/21	19/21	20/21	nontarget	offtarget		Total off-target hits	#Development genes	#Developmental processes/normal cell cycle genes	#Homeobox genes	#Other genes
1	Baum et al 2007	Insecta	Coleoptera	Chrysomelidae	Diabrotica virgifera	v-ATPase D subunit 1	287	AACGGTTATTTGGAAGGCCTGTGTCGTGGCTTTAAATGTGGGATCCTGAAACAATCCGATTATTTGAATTTGGTCCAGTGTGAAACTCTTGAAGATTTAAAACTGCACTTGCAAGGCACTGACTATGGAACTTTTTTGGCCAATGAACCTTCACCTTTGTCAGTATCCGTCATCGATTCAAGACTTCGAGAAAAACTCGTGATTGAGTTCCAGCACATGCGTAACCAAGCAGTAGAGCCTCTCTCGACATTTATGGACTTCATTACCTACAGTTACATGATCGACAA						4	2	no	vacuolar protein sorting-associated protein 45, intracellular protein transport protein USO1, trypsin 7 isoform x2, UDP-glucuronosyltransferase 2B18-like isoform X3, peripheral plasma membrane protein CASK, hyccin-like isoform		6	0	0	0	6
2	Baum et al 2008	Insecta	Coleoptera	Chrysomelidae	Diabrotica virgifera	alpha tubulin	924	AAGCTGCATTACTAGCTAATCTGAACGTCTGTCGTAATTTTGTTTCATTTGTGGTGTAAAAGTTAAAAACTCATCAACCAAAATGCGTGAATCGTATCTCAGTCCATCGTTGGCCAAGCCGGAGTCCAAATAGGTAATGCCTGCTCGGGAGTTGTACTCGCCTGGAACAGGGCATCCAACCTGACGGTCAGATGCCATCAGACAAGACTGTTGGAGGAGGAGATGACAGTTTCAACACATTCTTCAGTGAAACTGGTGCCGGCAAACATGTACCTAGAGCAGTATTTGTAGATTTGGAACCAACAGTAGTAGATGAAGTACGTACCGGCACATACCGTCAATTGTTCCACCCAGAACAACTCATCACTGGCAAAGAAGATGCCGCCAATAACTACTAGA…						12	4	yes	methyltransferase-like protein 9-like isoform, protein atonal-like isoform X1, tubulin alpha-1 chain-like, epidermal growth factor receptor-like, endothelin-converting enzyme-like 1-like isoform X2, DNA replication licensing factor Mcm6-like isoform X1, tubulin alpha-2/alpha-4 chain-like isoform X2, facilitated trehalose transporter Tret1-like, protein I'm not dead yet-like, tubulin epsilon chain…		16	3	0	1	10
3	Baum et al 2009	Insecta	Coleoptera	Chrysomelidae	Diabrotica virgifera	v-ATPase A subunit 2	765	GTTCAAAACAGAACAATTACACTACATTTATTGATTCTAACAATCTAATAGATGTTATAAGATACTCGTTTATCTTAATCTGTACAATTAACTTTAATTGGGTAATGTAATATACAAGATTAAAAGGGTAAAAGAAAAATTTAAAACAATTTACATGAAGAAAACCAAGTAATACTGAAAATATAAACGATATTAAGCACCTGTATATTTAAAAAAGTATTAAAACGAAAAAACTTAATAGTAATTGGAATGGCGGGAAAAATGTTTAAAAAGTATTTAATAAGCACTGTACCCTCACCCAAAAAAACTATACACATATTCAACAATTTACATAATTTATTTTGTACAGGATAATATCAAAAAAGAGAAAACCTATCTTTAGTTACTATCTTTAGTACG…						72	18	yes	multiple inositol polyphosphate phosphatase 1-like isoform, rhomboid-related protein 2 isoform X1, G/T mismatch-specific thymine DNA glycosylase-like, YEATS domain-containing protein 4 isoform X1, solute carrier family 25 member 35-like, roundabout homolog 2, hemicentin-1-like isoform X2, hyperpolarization-activated ion channel, sodium/potassium-transporting ATPase subunit alpha-like, F-box/LRR-r…		90	13	8	2	63
4	Baum et al 2010	Insecta	Coleoptera	Chrysomelidae	Diabrotica virgifera	v-ATPase E	899	ACAATAAATTTTCATCGGCGAAGATTTTCTCCACAAGAAAAAAATAATCTTTTTCACATCACATCATCAAACATCAAATCACGAATATCATTCTTCGAGAAAAAAAATCAAGGTAGTATCAACTCGAAACCTCAATAATTCTTCTCAAGGATCTTTCAAAAAATATTCTCGCTTCGACAAGGATCACAATTAGGGTAACAACAAACTCTAACTCGTTTAAAATACTCTCAAAAAAAGGAATCGGTTTATTATCATCATCATTCGTATCATACATCAGTAGTTTAAAAGGTTTTTCGAAGATCTCGTCTAAGCAACCAACAATCGTTTTACAATACTATATAAAATACAGGGAATACACAGTATCCAAAAAATACTTAATCAGTGAATTTTCTGGTTGAC…						29	7	no	neurobeachin-like, short coiled-coil protein homolog, pikachurin-like isoform, hemicentin-1 isoform, BTB/POZ domain-containing protein 7-like isoform, facilitated trehalose transporter Tret1-like, polypyrimidine tract-binding protein 1, CUGBP Elav-like family member 4-like isoform, protein kinase byr2-like isoform, trace amine-associated receptor 9-like isoform, leishmanolysin-like peptidase, tro…		36	3	7	1	24
5	Baum et al 2011	Insecta	Coleoptera	Chrysomelidae	Diabrotica virgifera	Ubiquitin conjugating enzyme	298	CTCTCCATCCCGACCTCTCGTGGCCGCCGCGAAGAAAAGGAGCTTATCATGGCTTCAAAACGTATCCTGAAGGAACTGAAGGACTTGCAGAAAGATCCTCCGAGATCATGCAGTGCAGGTCCTTCTGGCGAGGATATGTTCCATTGGCAGGCAACAATTATGGGTCCTCCTGATAGTCCCTATGCTGGAGGTGTTTTCTTAGTGAATATCCATTTCCCCCCGGACTACCCCTTCAAGCCTCCGAAGGTATCGTTCAAGACAAAGGTCTTCCATCCGAACATCAATAGCAATGGAGGCA						11		yes	elongation of very long chain fatty acids protein AAEL008004-like, dachshund homolog 2-like isoform, protein 4.1 homolog isoform, RING finger and SPRY domain-containing protein 1-like isoform, serine/threonine-protein phosphatase 4 regulatory subunit 1-like transcript variant X1, cytoplasmic polyadenylation element-binding protein 3-like, cytoplasmic polyadenylation element-binding protein 3-like…		11	2	1	0	7
6	Baum et al 2012	Insecta	Coleoptera	Chrysomelidae	Diabrotica virgifera	Swelling-dependent chloride channel	272	CTAGCCGTCAGAAAAGTTACTAATTCTCCAGTTATTTAATTGAGAATTTGACTTTATTCGTCACTAGCGCAATAACTCAGTATGGTGATTATTAATTCATTTAAACACCCCGAGTCTCCTATTAGGTATCAACAGGACGATGTTCAAGTCTACTTAGACAAGAAAGATTTGGGCCTGGGAACTTTATTTGTTAGTGAAAGCACATTATGCTGGCAACAAGAAGAGAACAATGGTTTTGCTATTGAATATTCAAGTATTTCCTTGCATGCCAT						11	3	no	probable 39S ribosomal protein L24 mitochondrial, heterogeneous nuclear ribonucleoprotein R-like isoform, chitotriosidase-1-like isoform, vesicle-trafficking protein SEC22b-B-like isoform, neuropathy target esterase sws isoform, glycogen debranching enzyme-like isoform, protein penguin, sialin-like, collagen alpha-1(II) chain-like,pyrroline-5-carboxylate reductase 2-like isoform, transmembrane pr…		14	2	2	0	9
7	Baum et al 2013	Insecta	Coleoptera	Chrysomelidae	Diabrotica virgifera	Glyceraldehyde-3-phosphate dehydrogenase	492	GTACCCCGTGCAGCTCTTGAAAAAGGAGTTGAAGTAGTAGCTGTCAACGATCCCTTCCTTGATGTCGACTACATGGTATACTTGTTCAAATTTGACTCTACCCACGGTCGCTACAAGGGATGTGTCAACAGTGATGGCAAAAACTTAGTTGTTGATGGCAAAGTCATTTCCGTACACCAAGAAAGAGACCCAGCTGCTATTCCATGGGGCAAAGCTGGTGCAGATTATGTAGTAGAATCTACCGGAGTGTTCACCACAATTGAAAAGGCCAAGAAACATCTTGACGGTGGTGCTAAGAAAGTCATCATCTCAGCTCCATCTGCTGATGCTCCAATGTATGTATGTGGTGTTAACTTGGATGCCTACAATCCAGCTGATCCCGTAATCTCTAACGCTTCT…					1	13	1	yes	beta-1-syntrophin isoform, nuclear receptor subfamily 1 group D member 2 isoform, tyrosine-protein phosphatase 99A-like isoform, sentrin-specific protease 1-like isoform, long-chain-fatty-acid--CoA ligase 3-like isoform, intracellular protein transport protein USO1-like isoform, glyceraldehyde-3-phosphate dehydrogenase 1-like isoform, beta-1-syntrophin isoform, nuclear receptor subfamily 1 group …		15	3	1	0	8
8	Baum et al 2014	Insecta	Coleoptera	Chrysomelidae	Diabrotica virgifera	Glucose-6-phosphate 1-dehydrogenase	282	ACAGTGACCATATAGCTTCCATCCAAATAAATTGTAAGGAACCCTTCGGAACTGAAGGCAGAGGAGGGTATTTTGACGAATTCGGCATTATTAGGGATGTAATGCAGAATCATATTTTACAAATTCTAGCTCTAGTAGCTATGGAAAAACCAGCTTCAGTTCAACCAGACGATATAAGAAATGAAAAGGTAAAGGTATTAAAAAGTATAGCTCCAATAAAGCTCAAGGACGTTGTATTGGGTCAGTACGTTGGAAATCCTGATGGACAAGGTAATGCGAAAT						7	1	yes	nuclear pore complex protein Nup160 homolog, glucose-6-phosphate 1-dehydrogenase isoform, spore wall protein 2-like isoform, peptidyl-prolyl cis-trans isomerase FKBP14-like, potassium voltage-gated channel protein Shal isoform, neuroligin 4 precursor, allatostatins precursor, protein starmaker-like,		8	1	0	0	7
9	Baum et al 2015	Insecta	Coleoptera	Chrysomelidae	Diabrotica virgifera	Chitinase ortholog	493	CACGCGTCCAAAATCAATCCTTGAAAAAAGGCAACTTCACGGAACTTTTACAAAAACTTAGTAAGGTTCTAAAACCCCAGGGATACTTATTAAGTGCAGCAGCTCCGGGAGCACGTGATAAAATTGATGAACCTTACGACATTCCAGCGATTTCAAAGCTACTAGACTTGGTCAATGTTATGGTTTTCGATTTCCACGGCGCTTTTGACAACTATGTAGGACATATCTCACCGCTTTTTCCCGCTAAAGTTGACTACGATTACTATAATAATAAAACATACAATGTGGATACAGGAATTCAATATTGGTTGAATGGTGGTGCAGATCCTGCAAAATTAAACTTGGGTGTTGTCGCTTATGGAAGAACTTTTACTTTGGCTGATAAAAATAATACCGCTC…						26	8	no	cytochrome P450 6AQ1 isoform, trithorax group protein osa-like, ataxin-2 homolog isoform, protein numb-like isoform, neuronal growth regulator 1-like, netrin-A-like isoform, protein BTG2-like, spindle assembly abnormal protein 6 homolog, protein Tob1-like isoform, papilin-like isoform, lachesin-like isoform, bifunctional heparan sulfate N-deacetylase/N-sulfotransferase transcript variant x1, netr…		34	5	6	1	24
10	Baum et al 2007	Insecta	Coleoptera	Chrysomelidae	Diabrotica virgifera	ADP-ribosylation factor	299	ACTATGGGTAATGTGTTTGCAAATTTATTCAAAGGCCTCTTTGGCAAAAAGGAAATGAGGATATTGATGGTACGACTCGATGCAGCTGGTAAAACCACAATTTTATATAAACTTAAATTAGGAGAAATTGTAACAACTATTCCAACAATTGGATTTAATGTGGAGACTGTAGAATATAAGAACATTAGTTTTACAGTATGGGATGTAGGTGGTCAAGATAAAATTAGGCCATTGTGGAGACACTATTTCCAAAACACACAACGCCTAATTTTCGTAGTAGACAGTAACCACACGGAAAC						16	6	yes	ADP-ribosylation factor 1-like isoform, aminoacylase-1-like, cytochrome b561 domain-containing protein 1-like, otoferlin-like isoform, nephrin isoform, putative inorganic phosphate cotransporter-like isoform, hairy/enhancer-of-split related with YRPW motif protein 1-like isoform, homeotic protein deformed, homeotic protein Sex combs reduced, aquaporin AQPAn.G-like isoform, A disintegrin and metal…		22	3	0	2	20
11	Baum et al 2007	Insecta	Coleoptera	Chrysomelidae	Diabrotica virgifera	Juvenile hormone esterase ortholog	303	TCGCGATGAGTAGACCCAACACAAACTGTTTTCAAGTCTTACCGAACAATAGCAGATGGCTATCGACACAAGATTCTGGAATTTTTCCCAAACGTCACACTGACTACTATGTATTTAATATGGGAAGACAGGAAGTGTTAGTGGAAGGATGGTGGGGAACAAAACTGGGATGGACTGGGGTTTTGGATGGAGTGAACCTGGCGCCTGGCAATGGTTACAGAATTGTAGTCAGTGATAAACCATATTTTGTAACAGCTGTGAAAATAACAAATAAAACAACTGTAAGGGCTCTCATGCATTGTT						8	2	no	probable phospholipid-transporting ATPase IA-like isoform, putative leucine-rich repeat-containing protein DDB_G0290503-like isoform, methylcytosine dioxygenase TET2-like isoform, U3 small nucleolar RNA-associated protein 6 homolog isoform, cell death-related nuclease 6 isoform, intracellular protein transport protein USO1-like isoform, trichohyalin-like, semaphorin-2A isoform X5, poly(A) polymer…		10	1	2	1	6
12	Baum et al 2007	Insecta	Coleoptera	Chrysomelidae	Diabrotica virgifera	Transcription factor IIB	430	TCGCGGGTCGATACAAGCGTCTAAACACACGTTCTGATGACATCAATTTCTAAAAATGTTCGCAAATTCCTACCAAAGCGGCTTCATTTCAATATTCTACAGCGTAGGAAGTAATCCACTAGCATTATGGGACAAGCAGGTAAAGAACGGACATATCAGACGGATTATGGACGATGATGTGAAATCATTAGTTTTGGAAATATCTGGAACTAATGTAGCTACTACTTATATAACGTGCCCCATCAAACCACGAGCTTCACTTGGAATCAGATTACCTTTTCTGATTATGATTATAAAGAATATGAAGAAGTACTTTACATTTGAAATTCAAATATTAGATGATAAAGATATGCGTAGAAGGTTTAGAATATCAAATTTCCAATCATCCACCAAAGTGAG…						19	2	no	transmembrane protein 65-like isoform, neurotrimin-like, protein unc-13 homolog D isoform, hemicentin-1-like isoform, protein G12-like, cysteine-rich motor neuron 1 protein-like, putative gustatory receptor 28b-like, sorbin and SH3 domain-containing protein 2-like isoform, GRAM domain-containing protein 3-like isoform, protein unc-13 homolog D isoform, tweedle motif cuticular protein, transmembra…		21	3	0	0	17
13	Baum et al 2007	Insecta	Coleoptera	Chrysomelidae	Diabrotica virgifera	Cysosolic juvenile hormone binding protein	390	GAAATCGATAACCTCCTGGAGCAACTAATATATTACCGTTCTCAACGGGCCAATTTTGTTCTTTTGCTCTTTCCAAAGCTTCTTTACTCTTTATTGTAATTTTCTCGAAATCGTTTCCTTTTTTGTAATTAGTGATGCCGTAGTTGTATGTTAGTTCGATAACGAAATGGTTGTCTTCTTCTCCGTAGCCGACCATGGTTTTGCTCCATCTGCCATCGTACGGTCCATTACAAGTAGCCTCGCAGCCTTCAGCAAACTCTTCGTGTCTTAGCAATTTCATTCCTAGCACTTGGAAATAAAATCTCATCGATTCTTTTCTATTCGGGATTTTGAAAACGAAATGTAGAGCTCTTCCTGACAACGACATTTTTATCACAAGTTTTAGCACAA						33	3	no	chymotrypsin-1, transcription factor AP-2-epsilon, DNA-binding protein D-ETS-4-like, serine/threonine-protein kinase NLK isoform, leucine-rich repeat-containing protein 49-like, DNA ligase 1-like isoform, E3 ubiquitin-protein ligase RNF14-like, protein turtle isoform, AMP deaminase 2-like isoform, lachesin-like, COMM domain-containing protein 7-like, arrestin domain-containing protein 2 isoform, …		36	7	7	1	21
14	Baum et al 2007	Insecta	Coleoptera	Chrysomelidae	Diabrotica virgifera	Actin ortholog	440	GCGGGTCGATACAAGCCTCTGCAAAGTGGGGCTTATTAGCTGTGTTTTTCTGTCTAGTGAGCAGTGATCAACCACAAAAGACAACATGTGTGACGACGATGTTGCGGCTCTTGTCGTTGACAATGGATCCGGTATGTGCAAAGCTGGATTCGCCGGAGATGACGCACCCCGTGCCGTCTTCCCCTCAATCGTCGGTCGCCCAAGGCATCAAGGTGTCATGGTTGGTATGGGACAAAAAGACTCATACGTAGGAGATGAAGCCCAAAGCAAAAGAGGTATCCTCACATTGAAATACCCCATTGAACACGGTATCATCACCAACTGGGATGATATGGAAAAAATCTGGCATCACACCTTCTACAATGAACTCCGTGTAGCTCCAGAAGAACACCCAGTCCT…					2	5	2	yes	actin, muscle-like, actin, indirect flight muscle-like, actin related protein 1, actin clone 205 like isoform, actin muscle like, protein deadpan-like, EF-hand calcium-binding domain-containing protein 1-like, actin clone 403-like, solute carrier family 12 member 8-like, immunoglobulin-like and fibronectin type III domain contaning 6 isoform		9	0	1	0	8
15	Baum et al 2007	Insecta	Coleoptera	Chrysomelidae	Diabrotica virgifera	Chitinase ortholog	735	AAACATCAGGTGCGGAAAAACGGGTCGTTTGTTATTTCGCCAGTTGGACCATTTATAGAGCAAGAAAAGGTGCTTTCGATGTCAGTAATATAGATCCATCGCTGTGTACACACATTAATTTTGCTTTCCTTGGTCTTAATGAAGATGGTTCTATTCACATTTTGGATTCCTGGGAGTCAAGTGATGCTGGTGGTCATGAGGGTTTTAAACATCTCGTAGAGCTTAAAAAGACCAATCCTGACCTTAAGGTATGTGTAAGTATGGGCGGTTGGAACGAAGGTTCCAAGCAGTATTCAGCAGTAGCATCAGATCCAGCAAAAAGAGTAAAACTTGCAGATGAGGTTTTAGCTTTTATCGAAAATTGGGGCTTCGATGGTTTTGATTTGGATTGGGAATATC…						44	11	yes	disintegrin and metalloproteinase domain-containing protein 10-like isoform, band 4.1-like protein 4A-like isoform, ankyrin repeat domain-containing protein SOWAHB-like isoform, Krueppel-like factor 6-like isoform, zinc finger protein 423 isoform, apidermin 3 precursor, transcription termination factor 2 isoform, transmembrane and TPR repeat-containing protein 1-like, syntaxin-17 isoform, solute …		55	8	7	2	40
16	Baum et al 2007	Insecta	Coleoptera	Chrysomelidae	Diabrotica virgifera	ATP synthase chain A	790	AATTATAAACCAAAATATTTTAAAACTAAAAAAACTAATTTAAAATTCAATTGAAAATGATAATAAATTTATTTTCTTCTTTCGACCCTACATCTAATTTTAATTTACCAATAAACTGATTAAGAACAGTATTAGGTCTATTAATTATTCCATCTAGATTTTGATTAATCCCCTCTCGTTATAATTATTTATGAATAAAGATTATTATAACATTACATAAAGAATTTAAAGTTTTAATTGGAAATTATAAATCCCAAGGAAGAACATTAATTTTTATCTCACTATTTAGATTAATTTTATTTAATAATTTTCTTGGATTATTCCCGTATATTTTTACTAGAACAAGACATATAACTTTAACATTAAGATTAGCTTTACCATTATGATTGAGATTTATAA…						63	14	yes	chymotrypsin-1, transcription factor AP-2-epsilon, RNA pseudouridylate synthase domain-containing protein 2-like isoform, dynein heavy chain 8 axonemal, protein-tyrosine sulfotransferase isoform, glutamate receptor ionotropic, kainate 2 isoform, homeotic protein proboscipedia, homeobox-leucine zipper protein ANTHOCYANINLESS 2-like, neuronal growth regulator 1-like, protein bric-a-brac 1-like, tet…		77	12	16	3	51
17	Baum et al 2007	Insecta	Coleoptera	Chrysomelidae	Diabrotica virgifera	Endoglucanase	823	ATTGTATCTATCTCATTCTATTTACAATACACAACCACTTCTTTCAACAAGTTCCCTTGGACATTGTACTTGATAAAATGTCACTTCGGGGTTAGAAACGCCTTCCATAAATGTAAACCTCCATTTGCATCCTGGTTGTAAAACTTCAGGAAGCTCGTTACACTCTTCTTCAGTATGGACTCCTCCGTATAAGTCACCCCAACCAGTACTGGGAGCGTTCCACTGAGCAGTACACCCTTTGGGGAATAAACCTACTCCACCTCCAGGGATACCGAGATCAAATTGGTTGGTCTGATACTCTTCACCAGAGTTAGTGAGTTGAACCAAGAATTGCTTTCCTTTCAGCTGACCCTCAAAATTTAGTAACATGCAGGAACAACACATGCTAGTATCAATACC…					1	41		no	protein deadpan-like, EF-hand calcium-binding domain-containing protein 1-like, polypyrimidine tract-binding protein, m7GpppX diphosphatase-like isoform, EF-hand calcium-binding domain-containing protein 14-like, endoplasmic reticulum metallopeptidase 1-like, DNA helicase MCM8, circadian locomoter output cycles protein kaput, SWI/SNF chromatin-remodeling complex subunit sol1 isoform, spore wall p…		42	5	8	2	27
18	Baum et al 2007	Insecta	Coleoptera	Chrysomelidae	Diabrotica virgifera	ADP/ATP translocase	937	GGCCGCCGACGTCGGTAAAGGTGCCGGTGAACGTGAATTCTCTGGTTTGGGTAACTCGCTTAGTCAAAATCTTCAAAGCTGACGGCTTGGGAGGATTATATCGTGGATTTGGTGTATCAGTACAAGGTATCATTATCTACCGTGCCGCTTTCTTCGGTTTCTACGATACTGCCAAGGGTATTTTGCCCGATCCTAAGAACACTCCTCTTGTAGTTTCATGGGCCATTGCACAGACTGTAACCACTGTTGCTGGTATCATCTCATATCCCTTCGATACTGTCCGTAGGCGTATGATGATGCAGTCTGGACGTAAGAAGACCGAAATCATCTACAAAAGCACTGCTCACTGCTGGGCCACAATCGCCAAGACCGAAGGTACCGGTGCCTTCTTCAAGGGAG…						49	8	yes	transcription initiation factor TFIID subunit 3-like, telomerase-binding protein EST1A-like isoform, kinesin 3B isoform, tensin-1 isoform, ADP/ATP translocase, ADP,ATP carrier protein-like isoform, SIFamide receptor, BAI1-associated protein 3-like, serotonin receptor isoform, TAR DNA-binding protein 43-like isoform, ATP-binding cassette sub-family D member 3-like, leucine-rich repeat-containing p…		57	6	6	0	43
19	Baum et al 2007	Insecta	Coleoptera	Chrysomelidae	Diabrotica virgifera	Activating transcription factor	894	CTCACCTAAGATAACCTTTTATTAGTGATTCGATTATATCTACGTTATAAGTGAAACAATGATTATCGTATCGAAATTATAATTAATAAAAATTATTGAGATCGGCATCTTACAAGTGGAATCAATCCACACGTTAGACGCCAAACCTCCTAAGCCTAATAAAATCTTTCCTAAGACAACTACCTACAATACGATCATCATTGATACCCAAGTTGACGAGAACACAACAATAAGGCGTGATATCAAGGAATCTCAAGCATCTCTCTCAAATGAGCAAACATTTTGATGATTCTCCCTCCAGGTGTCCAATTTAAATGCAACATATAAAAACAATTGTGCCGTCAAAAACACGCTATAAATTGCCAAAACTATATAAGAGAATCAACAAAATCCTCGAAG…						68	1	no	potassium voltage-gated channel protein Shaw isoform, carbonic anhydrase 2, oxidation resistance protein 1-like isoform, protein slit isoform, SNAPIN protein homolog, ras guanine nucleotide exchange factor P-like isoform, protein BTG2-like, spindle assembly abnormal protein 6 homolog, nicotinic acetylcholine receptor alpha6 subunit isoform, exonuclease 1-like isoform, ATP-binding cassette sub-fam…		69	4	10	0	51
20	Baum et al 2007	Insecta	Coleoptera	Chrysomelidae	Diabrotica virgifera	mRNA capping enzyme	594	CTTATTTCGATTTGACTATGTGATGGATTGAGACCTTAGGCAGAGCCTTAACGTTGATTGCCGAGTCAAGACCTGTAGGCATCTATAAAGGCGACTATATACAAGAATTATATGCAAGATATGATGATGTCAGTGATGCTCCACCTCCACCATCTCTTCCTGATTGGTGTACAGAAAGTGACGATGGACAAGGGAATGGCCTTGACGATTTCGATGATTTTACTGAAGATGCAAGAAAACGAGTAGCTTCAACTTCTTCAAATAATGATGATACTTCACCAAAAGCTAAAAAGGGTCGCTTCTAGGAAGTCGCATTTATGGAGGGAGTACCTAACGTTACCCACTTTGTAGAGGAACAAGCGACCCGAGATTGCAAACGAATGGTGCCTAGGATGTGTA…				nontarget hit but not at needed level of specificity	1	43	2	no	rho guanine nucleotide exchange factor 12 isoform, low density lipoprotein receptor adapter protein 1-B-like, protein abrupt-like isoform, protein prickle-like isoform, histone-lysine N-methyltransferase SETMAR-like, hyperpolarization-activated ion channel, bifunctional protein NCOAT-like isoform, protein escargot, calcium-dependent protein kinase 4-like, putative RNA-binding protein 15B isoform,…		46	5	11	2	29
21	Baum et al 2007	Insecta	Coleoptera	Chrysomelidae	Diabrotica virgifera	apple ATPase	884	GCTTGAGTAAAAACTGAAATCATATAAAAGAGATAATTTCTATTGTGAACTAATTTTTCAAAAGTTTCTACATTAAGTACATATTCATTACTAAATAATGGCCGAAAACAAAAATCCAGAGGATTTGGCCACCGCAATTCTCCGTAAGAAAGATCGTCCAAATAGACTTTTGGTAGAAGAAGCAGTTAACGATGATAACTCCGTGGTTGCTTTGTCACAAGCAAAAATGGATGAACTACAACTTTTCAGAGGAGACACAGTCCTACTGAAGGGCAAGCGAAGGAAAGAAACTGTTTGTATAGTATTATCTGATGATACATGTAGCGATGAAAAAATTCGTATGAATAGAAATAATTTAAGAGTTAGGCTTTCAGATGTAGTTTCTATCCAAGCTTGCCC…						72	9	yes	octopamine receptor beta-3R-like isoform, phospholipase A2 isozymes PA3A/PA3B/PA5, transmembrane protein 164-like isoform, protein kinase C-binding protein NELL1-like isoform, protein G12-like, cysteine-rich motor neuron 1 protein-like, transmembrane channel-like protein 3-like isoform, calcium-binding mitochondrial carrier protein SCaMC-1-B-like, ubiquitin-related modifier 1-like, slit homolog 1…		81	13	7	3	62
22	Baum et al 2007	Insecta	Coleoptera	Chrysomelidae	Diabrotica virgifera	Ribosomal protein L9	642	GCCCTTTTTTTCTGTCCATTTTATGTCACAAGTAGGGCTAAAATGAAGCAAATTGTAACAAACCAAACGGTAAAAATTCCTGAGGGAATTACAGTAACCACTAAGTCAAGGGTAGTAACTGTAAAAGGACCCCGAGGTAATCTGAAGAGATCCTTCAAACATCTTACCCTGGACATTCGAATGATCAACCCCAGGTTACTGAAAGTAGAGAAATGGTTCGGTACCAAGAAGGAATTAGCTGCTGTCAGAACAGTATGCTCTCATGTTGAAAACATGTTAAAGGGTGTTACAAAAGGATACCAATACAAGATGAGAGCAGCATATGCTCACTTTCCCATTAACTGTGTCACCACTGAAGGAAACACAGTTATCGAAATTAGAAATTTCTTGGGAGAAAAA…						43	12	yes	60S ribosomal protein L9, obscurin-like isoform, suppressor of lurcher protein 1-like isoform, flocculation protein FLO11-like, beta carbonic anhydrase 1-like, putative gustatory receptor 28b-like, protein FAM46A-like isoform, histone-lysine N-methyltransferase SETMAR-like, mitotic spindle assembly checkpoint protein MAD1, kanadaptin-like, elongation of very long chain fatty acids protein AAEL008…		55	4	3	0	44
23	Baum et al 2007	Insecta	Coleoptera	Chrysomelidae	Diabrotica virgifera	Ribosomal protein L19	652	CACGTTGAGAGGTGCATTTGCACGATGAGTTCCTTAAAACTTCAGAAGAGGCTAGCAGCCTCTGTTATGCGATGTGGTAAAAAGAAAGTATGGTTGGACCCTAATGAAATCAACGAAATTGCCAACACTAACTCAAGACAGAACATCCGTAAGTTGATAAAGGATGGTCTTATTATTAAGAAGCCCGTAGCTGTACATTCCCGTGCCCGTGTTCGCAAAAACACTGAAGCCCGCAGGAAAGGAAGGCACTGCGGTTTTGGTAAAAGGAAGGGTACTGCTAATGCCCGTACCCCGCAAAAGGAATTATGGATTCAACGCATGAGAGTTTTGCGTCGTCTCCTTAAAAAATACAGGGAAGCTAAAAAAATTGACAGACATCTATACCACTCACTCTACATG…						26	3	yes	Ribosomal protein L19, polypyrimidine tract-binding protein, m7GpppX diphosphatase-like isoform, hemicentin-1 isoform, titin isoform, ras-associated and pleckstrin homology domains-containing protein 1-like isoform, unconventional myosin-XVIIIa isoform, RNA polymerase II elongation factor ELL2-like isoform, fibrillin-2 isoform, troponin C type I isoform, NCK-interacting protein with SH3 domain-li…		29	2	3	1	24
24	Baum et al 2007	Insecta	Coleoptera	Chrysomelidae	Diabrotica virgifera	26S proteosome regulatory subunit p28	1115	TAATACGACTCACTATAGGGAGAACGCTGCACATAAGGGAGATTTTGACTATGTTTCAGAAAAGATTGAAGAGTTTCCAATAATTTTAGAAGCACCAGACTCTGTAAGTTGTAATTATTTGTATATTATTATCTAACGTTAATCTCTAGACGAACCTTTATTATATCCAATCTCTACCGTGCAATACTAAAATGTACCACGTACATTTGTAGTTCCTTTGATTTTTTTAATTTCATTTTTTTAACAGGTTTTGCAAATGTATACATTTTTATTTTGGTTACATAGTCAGGTTATACAGTCCGTATAATTTCAATAATTTCTCTATCTAGTATAGAACCCATGTCACCTTATCAACCTATTATCCTGCATATTTAAATGCAGTAAAACCACATTTAAAAA…						58	6	yes	nicotinic acetylcholine receptor alpha6 subunit, protein TKR-like isoform, protein BTG2-like, protein odd-skipped-like, cadherin-89D-like isoform, neurocalcin homolog, kinesin 3A isoform, 28S ribosomal protein S29 mitochondrial isoform, putative gustatory receptor 28b-like, putative pre-mRNA-splicing factor ATP-dependent RNA helicase DHX15-like, 26S proteasome non-ATPase regulatory subunit 1-like…		64	5	6	0	53
25	Baum et al 2007	Insecta	Coleoptera	Chrysomelidae	Diabrotica virgifera	Chromodomain helicase-DNA-binding protein	336	TAATACGACTCACTATAGGGAGAGACGGAGGAATGACAACTGACACACGAGAAGACACGACATGGCAAGAAAATCTCTCCGATTACCATTCTGACTTTTCTGCGGGATCAGATGAGGATAAGGAAGACGATGATTTCGATGAGAAGAACGACGCCGATTTAAGCAGAAGAAGTCGAAGAAAGATGGAAAGAAAAGACGAGAAGGACCGTCCACTACCACCGTTACTAGCCAGAGTTGGGGGAAATATTGAAGTGCTCGGTTTTAATGCCAGGCAGCGTAAAGCGTTCCTTAATGCTATTATGCGCTACGGAATCTCCCTATAGTGAGTCGTATTAA						29	7	no	semaphorin-1A-like isoform, RNA-binding protein Musashi homolog Rbp6-like, microtubule-associated protein Jupiter-like isoform, DNA repair endonuclease XPF-like, zinc finger protein 853 isoform, probable serine/threonine-protein kinase vps15-like, zinc finger homeobox protein 4-like isoform, Krueppel-like factor 6-like isoform, voltage-dependent L-type calcium channel subunit beta-2 isoform, broa…		36	10	7	1	20
26	Baum et al 2007	Insecta	Coleoptera	Chrysomelidae	Diabrotica virgifera	Beta tubulin	399	TAATACGACTCACTATAGGGAGACAAAAATCCGTGAAGAATACCCAGATAGAATTATGAACACATACTCAGTAGTCCCCTCTCCCAAAGTATCAGATACCGTAGTAGAACCATACAACGCCACACTTTCAGTACATCAATTGGTAGAAAACACAGATGAAACATACTGTATTGATAATGAAGCTCTCTATGACATTTGCTTCAGAACTTTGAAACTCACAACACCCACATACGGAGACTTAAACCATTTGGTATCCCTCACAATGTCCGGTGTAACCACCTGCCTTAGGTTCCCAGGTCAGTTGAATGCTGATCTTAGAAAATTGGCTGTCAACATGGTTCCCTTCCCCCGTCTCCACTTCTTCATGCCCGGATTCTCTCCCTATAGTGAGTCGTATTA						19	2	yes	ice-structuring glycoprotein-like, tubulin beta chain-like, GPN-loop GTPase 3-like, hemicentin-1 isoform, tubulin alpha-2/alpha-4 chain, tubulin beta-1 chain, endoribonuclease Dicer-like, dorsal-ventral patterning protein Sog isoform, regulating synaptic membrane exocytosis protein 1-like isoform, dimethyladenosine transferase 1 mitochondrial, protein TKR-like isoform, protein BTG2-like, G kinase…		21	3	2	0	16
27	Baum et al 2007	Insecta	Coleoptera	Chrysomelidae	Diabrotica virgifera	V-ATPase A	558	AGAAGCCTGGCAATTTCCAAGGTGATTTTGTCCGTTTCTGCCAGAGATGCTTTACCTACCAGCTGCACAATTTCGGCTAGATCATCTTCTTCCTGAAGAATTTCCTTAACTTTGGTTCTAAGAGGAATAAACTCTTGGAAGTTTTTGTCATAAAAGTCGTCCAATGCTCTTAAATATTTGGAATATGATCCAAGCCAGTCTACTGAAGGGAAGTGCTTACGTTGGGCAAGaagtactgcgatcgcgttaacgctgtgatgtgaaacttgaaattatttgtgttttgattgtgattgtgagagtaacggtggcggccgcctgcaggagcCTTGCCCAACGTAAGCACTTCCCTTCAGTAGACTGGCTTGGATCATATTCCAAATATTTAAGAGCATTGGA…						15	1	no	putative uncharacterized protein DDB_G0271982-like, LIM domain only protein 3-like isoform, probable calcium-binding protein CML11-like isoform, eukaryotic translation initiation factor 4 gamma, protein Skeletor, isoforms D/E-like isoform, mitochondrial import inner membrane translocase subunit TIM14-like isoform, histone acetyltransferase type B catalytic subunit-like, dnaJ protein homolog 1-lik…		16	0	3	0	13
28	Zhou et al 2008	Insecta	Isoptera	Rhinotermitidae	Reticulitermes flavipes	Cellulase-1 (AY572862)	1489	CCACTACCAGCCGCCATGAAGGTCTTCGTTTGTCTTCTGTCTGCACTGGCGCTTTGCCAAGCTGCTTACGACTATAAGACAGTACTAAGCAATTCGCTACTTTTCTACGAGGCTCAGCGATCGGGAAAATTGCCGTCTGATCAGAAGGTCACGTGGAGGAAGGATTCCGCCCTTAACGACAAGGGCCAGAAGGGCGAGGACCTGACAGGAGGATACTATGACGCTGGTGATTTTGTGAAGTTCGGCTTCCCTATGGCGTACACAGTCACCGTCCTCGCTTGGGGTGTTATAGACTACGAATCAGCGTATTCTGCAGCAGGAGCTCTGGATAGTGGTCGCAAGGCTCTTAAATATGGCACGGACTACTTCCTCAAGGCGCACACGGCCGCGAACGAATTC…						32	5	no	homeobox protein caupolican-like isoform, UPF0668 protein C10orf76 homolog isoform, dystrophin isoform like, glutamate receptor 1-like isoform, kinesin 12 isoform, netrin receptor UNC5B-like isoform, bifunctional heparan sulfate N-deacetylase/N-sulfotransferase-like isoform, sodium/hydrogen exchanger 3 isoform, lateral signaling target protein 2 homolog, SAGA-associated factor 29 homolog, endoglu…		37	6	3	1	28
29	Zhou et al 2008	Insecta	Isoptera	Rhinotermitidae	Reticulitermes flavipes	Hexamerin-1 (AY572859)	2587	GCGACCACCATGAGGACAGCAGTGCTGCTCGTGTTTCTGGCCACAGCGGCCCTAGCAGCGCAAACCCGAGCCCAAGTCAAGAGTCCAGAATCATCGCTGACAAGCAGTTCCTGCAGCGGCAGAATGACTTCCTGCGCCTCCTGGTCCGCATCGAACAACCAAATTACTACGAAGACCAGGTGACACTCGGCAATTCATACGACATCGAAGTGAACATCAAAAACTACAAGCACCCTCAAGTGGTAAAGCAGTTCTTGTCAGCCTACAAGAAGGGTTTCCTGCCTCGTGGTGTGCCATATTCTCCCTACTACACCACCCAGAGCTACGAGACCAAGCTTCTGTTCGATCTGTTCTACTACGCCAATGACTATGACACTTTCTACAAGACTGCAGTCTGGG…				nt 645-721 had the bulk of the hits, though no nontarget hits.	1	169	22	no	dystrophin isoforms A/C/F/G/H-like, mucin-5AC-like, potassium voltage-gated channel subfamily KQT member 1-like, arrestin domain-containing protein 3 isoform, synaptotagmin 20 isoform, homeobox protein prospero isoform, hemicentin-1-like isoform, heat shock protein, gamma-aminobutyric acid receptor subunit beta isoform, transcriptional activator protein Pur-beta-B-like isoform, zinc finger protei…		192	20	19	3	87
30	Choudhary and Sahi 2011	Insecta	Lepidoptera	Noctuidae	Helicoverpa armigera	PTTH	21	ACAGCCTAGCCAACCGTAAAT								no	no		0
31	Choudhary and Sahi 2011	Insecta	Lepidoptera	Noctuidae	Helicoverpa armigera	PTTH	23	AACACCTACCCACGTTACATAGA								no	no		0
32	Choudhary and Sahi 2011	Insecta	Lepidoptera	Noctuidae	Helicoverpa armigera	PTTH	21	AAACACCTACCCACGTTACAT								no	no		0
33	Choudhary and Sahi 2011	Insecta	Lepidoptera	Noctuidae	Helicoverpa armigera	PTTH	21	AACACCTACCCACGTTACATA								no	no		0
34	Choudhary and Sahi 2011	Insecta	Lepidoptera	Noctuidae	Helicoverpa armigera	PTTH	21	GAGTCAGTTTACCCACGTATT								no	no		0
35	Choudhary and Sahi 2011	Insecta	Lepidoptera	Noctuidae	Helicoverpa armigera	Molt regulating transcript factors3	21	AAACTATGTTGAGGTCGGCTA								no	no		0
36	Choudhary and Sahi 2011	Insecta	Lepidoptera	Noctuidae	Helicoverpa armigera	Diapause hormone and pheromone biosynthesis activating neuropeptide	21	AATTACAACCCTACGCCTTAC								no	no		0
37	Choudhary and Sahi 2011	Insecta	Lepidoptera	Noctuidae	Helicoverpa armigera	Diapause hormone and pheromone biosynthesis activating neuropeptide	21	AACCCTACGCCTTACAAATCA								no	no		0
38	Choudhary and Sahi 2011	Insecta	Lepidoptera	Noctuidae	Helicoverpa armigera	Diapause hormone and pheromone biosynthesis activating neuropeptide	23	AACCCTACGCCTTACAAATCAGG								no	no		0
39	Choudhary and Sahi 2011	Insecta	Lepidoptera	Noctuidae	Helicoverpa armigera	Diapause hormone and pheromone biosynthesis activating neuropeptide	21	AACGCCTACGATCCCGGTCTT								no	no		0
40	Choudhary and Sahi 2011	Insecta	Lepidoptera	Noctuidae	Helicoverpa armigera	Diapause hormone and pheromone biosynthesis activating neuropeptide	21	AAACTATGTTGAGGTCGGCTA								no	no		0
41	Choudhary and Sahi 2011	Insecta	Lepidoptera	Noctuidae	Helicoverpa armigera	Diapause hormone and pheromone biosynthesis activating neuropeptide	21	AACCGTACAACCCAATACTCC								no	no		0
42	Choudhary and Sahi 2011	Insecta	Lepidoptera	Noctuidae	Helicoverpa armigera	Diapause hormone and pheromone biosynthesis activating neuropeptide	21	ACCGTACAACCCAATACTCCT								no	no		0
43	Gong et al 2013	Insecta	Lepidoptera	Plutellidae	Plutella xylostella	AChE2	19	CGGCGACACTTGATCTATA								no	no		0
44	Christiaens et al 2014	Insecta	Hemiptera	Aphididae	Acyrthosiphon pisum	ecdysone receptor EcR	390	GACCTCCCGAAGAGCTTTGTCTGGTGTGCGGCGACCGGTCGTCCGGTTACCATTACAACGCGCTGACATGCGAAGGGTGCAAGGGGTTCTTCCGGAGGAGCATCACCAAGAACGCCGTGTACCAGTGCAAGTACGGCAACAACTGCGAAATCGACATGTACATGAGGCGGAAGTGCCAGGAGTGCCGGCTGAAAAAATGCCTCACCGTCGGCATGAGGCCTGAATGTGTTGTACCTGAAGTTCAATGTGCAGTAAAAAGAAAGGAGAAAAAAGCTCAACGAGAAAAAGATAAACCAAATTCTACTACAGATATTTCTCCAGAAATAATAAAAATAGAACCTACAGAGATGAAGATTGAATGCGGTGAACCAATGATAATGGGCACGCCTA				large number of hits to regions on unplaced scaffolds with no genes assigned		21	5	yes	ecdysone receptor isoform A, rho GTPase-activating protein 100F-like isoform, serine protease easter, neurogenic locus Notch protein isoform, SWI/SNF chromatin-remodeling complex subunit sol1 isoform, mitochondrial inner membrane protein OXA1L-like, U4/U6.U5 tri-snRNP-associated protein 1-like isoform, histone-lysine N-methyltransferase SETD2-like isoform, peptidyl-alpha-hydroxyglycine alpha-amid…		26	5	5	1	14
45	Christiaens et al 2014	Insecta	Hemiptera	Aphididae	Acyrthosiphon pisum	Ultraspiracle USP	412	CAATGGGTCCTCAGTCACCTCTAGACCTCAAACCCGACACGGCAACTCTAATGGTCAATTTCAGCCCTCCGGGAGCTCCTCTAAGTCCTGCAGGATTATACAGTGTCGACCGGAACAATATGATGAATAATTCTTGCAACGTACAAGACTCTCCGAATTACCCGCCCAACCATCCGCTCAGCGGTTCGAAACATCTGTGCTCCATATGCGGCGATCGCGCCAGCGGAAAACATTACGGAGTGTACAGCTGCGAGGGGTGCAAAGGGTTCTTCAAACGTACCGTGAGGAAGAATTTGTCTTATGCGTGTCGCGAAGAAAACAAATGCATCATCGACAAGCGCCAACGAAATCGGTGCCAGTACTGCAGGTATCAAAAATGTTTGACCATGGGCATGAAAA…						23	4	yes	elongation of very long chain fatty acids protein AAEL008004-like, rab11 family-interacting protein 4-like isoform, probable RNA-binding protein 19-like isoform, alpha-actinin sarcomeric, pre-rRNA processing protein FTSJ3-like isoform, ecdysone-induced protein 75 isoform, eyegone, ultraspiracle isoform, metastasis-associated protein MTA3-like isoform, glypican-4, nuclear hormone receptor FTZ-F1 i…		27	5	4	0	16
46	Christiaens et al 2014	Insecta	Hemiptera	Aphididae	Acyrthosiphon pisum	vATPase E subunit	185	TTAGCCAACACTGGAATAAACGTCAAAATAAACATTGATAAAAGTATTAAATTACCGACTCAAGAAATAGGAGGCGTCGTGGTCACGTCCAAAGATCGAAGGGTACATGTTGAAAATACGCTTGTAGTGAGATTGCTCTATCTCACCCAACAAGCAATACCAATAATATGCACTGGACTGTTTGG						8	2	no	venom acid phosphatase Acph-1-like isoform, voltage-dependent calcium channel type A subunit alpha-1, MAGUK p55 subfamily member 6 isoform, short-chain dehydrogenase/reductase family 16C member 6-like, myosin light chain alkali-like isoform, poly(rC)-binding protein 4-like isoform, dynein heavy chain 8, axonemal, neuronal growth regulator 1-like, cadherin-87A-like isoform, probable helicase senat…		10	0	0	0	11
47	Christiaens et al 2014; Mutti et al 2006	Insecta	Hemiptera	Aphididae	Acyrthosiphon pisum	C002	620	CCAGTGCGATAGCGATAATTTACAACATGGGAAGTTACAAATTATACGTAGCCGTCATGGCAATAGCCATAGCTGTAGTACAGGAAGTTAGATGCGATTGGTCTGCCGCTGAACCGTACGATGAGCAGGAAGAAGCGTCTGTCGAATTACCGATGGAGCACCGTCAGTGCGATGAATACAAATCGAAGATCTGGGACAAAGCATTTAGCAACCAGGAGGCTATGCAGCTGATGGAACTAACGTTTAATACAGGTAAGGAATTAGGCTCCAACGAAGTGTGCTCGGACACGACGCGGGCCATTTTTAACTTCATCGATGTGATGGCCACCAACCAGAACGCCCATTACTCGCTGGGTATGATGAACAAGATGTTGGCGTTCATCATAAGAGAGGTGGACA…					1	27	1	no	solute carrier family 35 member F3-like isoform, soluble guanylyl cyclase alpha 1 subunit, leucine-rich repeat-containing protein 24-like isoform, UPF0668 protein C10orf76 homolog isoform, transcriptional enhancer factor TEF-1 isoform, polycomb group protein Pc, ras-related protein Rab-37 isoform, SIFamide receptor, succinate dehydrogenase [ubiquinone] flavoprotein subunit mitochondrial subunit, …		29	4	2	0	23
48	Tang et al 2010	Insecta	Lepidoptera	Noctuidae	Spodoptera exigua	Hexamerin (SeHex)	343	GACAGCCACGGCTATGAGATTCCTCTCCACGTCAACTCCCACAACTTCTTGCAAATCGATGAATTCGTCCATGATTTACCCGCGGGAGAATCTGTAATTGCTCGCGACTCTGTTGATACCAGCAAAGTCTGGGACACCGCCAACAATGTATACTACGCTTTTGAGAAATCCCTGCAGGGTGATAAACAATTCAACATGGAACAACTCGAGAATATGGAGTCGCTGGTCCAACATCTTACACTGCCTAAAGGACGCGTCGGTGGCATGCCTTTCGTTTTGATGGTCTACATTTCCGACTACCGCGCACCCAAGGTTCCTCGCGAGCCTACCAATGTTTCTAAGG						19	4	no	protein timeless homolog isoform, F-box only protein 33-like isoform, transcriptional repressor p66-alpha-like isoform, syntaxin-17 isoform, beta-1,4-N-acetylgalactosaminyltransferase bre-4 isoform, protein groucho isoform, 2-oxoglutarate dehydrogenase mitochondrial-like isoform, transcription factor MafG-like isoform, ankyrin repeat and fibronectin type-III domain-containing protein 1 like, prob…		23	3	9	0	11
49	Tang et al 2010	Insecta	Lepidoptera	Noctuidae	Spodoptera exigua	Methionine rich storage protein (SeSP1)	419	GACTGGAAAGAACACCATCGTCCGCAACTCCGTGGAGATGCACGGCGTCATTGAGCGGCGACCATGGACCCGCCGCATCCTCAACAACATGCGGGACACCGTCGGCATGATCAGCAAGACTGTTGACGTTGAGAGCTGGTGGTACAAGACCCGCGTCGGCTACCCGCACAGGCTTCTCTTGCCTCTTGGTCGCTTGGGTGGTTTCCCTCTGCAGATGTACGTGATCATCACCCCAGTGAGGACCAACCTCCTTCTGCCCACCGTCGACATGAACCTGATGAAGGAGCGCAGAACTTGTCGCTGGAGCGTCTGTTTCGACACGATGCCGCTCGGCTTCCCCTTCGACAGAAAGATTGACATGACTAAGTTCTTCACCCAAAACATGAAGTTCGCCGACGT…						3	1	no	ankyrin repeat domain-containing protein 50 isoform, mannosyl-oligosaccharide alpha-1,2-mannosidase isoform A-like isoform, MDS1 and EVI1 complex locus protein EVI1-A-like, synaptotagmin-C isoform		4	0	1	0	4
50	Wuriyanghan et al. 2011	Insecta	Hemiptera	Triozidae	Bactericerca cockerelli	actin-like mRNA partial sequence	308	CTCCCTGTACGCCTCTGGTCGTACCACCGGTATCGTGCTCGACTCTGGAGATGGTGTCTCCCACACCGTCCCCATCTATGAAGGTTACGCCCTCCCCCACGCCATCCTCCGTCTGGATCTGGCTGGTCGTGACTTGACCGACTACCTGATGAAGATCCTCACCGAGAGAGGTTACTCCTTCACCACCACCGCTGAGCGGGAAATCGTCCGTGACATCAAGGAGAAGCTCTGCTACGTGGCCCTGGACTTCGAGCAGGAGATGGCCACCGCCGCCGCCTCCACCTCCCTGGAGAAGAGCTACGAGCTGC				majority of hits 229-308	4	92	13	yes	actin muscle like, agrin-like isoform, homeotic protein ocelliless isoform , dachshund homolog 2-like isoform, serine/threonine-protein kinase STK11 isoform, sodium-coupled monocarboxylate transporter 1-like isoform, actin related protein 1, transducin-like enhancer protein 4-like isoform, ataxin-10-like isoform, protein Wnt-2, protein distal antenna-like, coiled-coil domain-containing protein lo…		109	23	21	6	57
51	Wuriyanghan et al. 2011	Insecta	Hemiptera	Triozidae	Bactericerca cockerelli	vATPase	330	TTGTGCTGGACCCTACCATTAAGAAGACACTTAAAATCGAAGCCCTTAAGTCAATAGGTCAGAAGCAAAAGTTCTCTGCAGCCTCTATTAACTTGCTCTCACTGTTAGCTGAGAATGGAAGGCTCAAGAGCATTGATGGAGTCATCAACAACTTTTCCATTATCATGGCAGCCCACAGAGGAGATCTGCCAGTGGAAGTTATCACTGCCAGGCCTCTGGATGATGCTGACAAGACAGAGCTGCAATCCACCCTGAAACTTTTTGCCAAGAAGGGCGAGAACATTATTCTGACATCCAAAGTTGATCCCAGCATCATTGGAGGCATGATTG						7	1	no	tyrosine-protein kinase Drl isoform, A disintegrin and metalloproteinase with thrombospondin motifs 3 like, transcription factor AP-1, syntaxin-17 isoform, protein kibra-like isoform, homeobox protein homothorax-like isoform, autophagy-specific gene 6 isoform, protein slit isoform,		8	4	1	1	3
52	Wuriyanghan et al. 2011	Insecta	Hemiptera	Triozidae	Bactericerca cockerelli	Heat shock protein (Hsp70)	240	GACCACACCCAGTTATGTTGCCTTCACTGACACTGAACGTCTAATAGGAGATGCTGCCAAAAACCAAGTAGCAATGAACCCCAACAACACCATTTTTGATGCCAAACGTTTAATAGGCCGTAAGTTTGAAGATGCCACCGTTCAAGCTGACATGAAACATTGGCCCTTTGAAGTGATTAGTGATGGAGGCAAACCCAAGATACAAGTCAATTACAAAGGCGAGACCAAATCTTTCTTCCC					1	4	2	yes	heat shock protein cognate 4, heat shock protein Hsp70Ab-like, hemicentin-1 isoform, heat shock protein cognate 3 precursor, transient receptor potential-gamma protein isoform, protein turtle isoform, semaphorin-2A isoform,		7	2	0	0	3
53	Wuriyanghan et al. 2011	Insecta	Hemiptera	Triozidae	Bactericerca cockerelli	Chloride intracellular channel (CLIC)	288	GCTAAAAACCATTAGCTTGAAGGTTACAACAGTTGATATGCAGAAACCTCCACCTGATTTCAGAACAAACTTTGAAGCTACTCCACCACCAACTCTTATAGACAATGGCCTGGCTGTACTTGAAAACGAAAAAATTGAGCGTCATATCATGAAAAATGTACCTGGAGGACACAACCTATTCGTGCAAGACAAGGAAGTTGCTGTTCTCATTGAGAACCTGTATAGTAAATTAAAATTGATGCTCTTGAAGGAAGATGATGTCAGCATAAATGCCCTCATGTCACACCT						8		no	fasciclin-3 isoform, ABC transporter G family member 20-like isoform, band 4.1-like protein 4A-like isoform, F-box/WD repeat-containing protein 7 isoform, spectrin alpha chain-like, disintegrin and metalloproteinase domain-containing protein 12 isoform, TBC1 domain family member 1 isoform, elongator complex protein 6-like,		8	1	1	0	6
54	Maori et al. 2009	Insecta	Hymenoptera	Apidae	Apis mellifera	IAPV 1	408	CACCCCTCTCAAACAATCTCAAACATGCTATATAAGAAGCTTTCTTATACCACGTAATTACTCAGCTGATGAAATTAACGTAGACGGACCTTCACATATAACATACCCCGTAATCAATCCTGTGCATGAAGTAGAAGTTCCATTCTATTCTCAGTATAGGAAAATACCTATCGCTTCAACATCGGATAAAGGTTATGATTCCTCTCTAATGTATTTTTCAAATACAGCAACAACTCAAATTGTTGCCAGAGCAGGAAACGATGACTTTACCTTTGGTTGGATGATAGGTCCACCCCAGCTACAAGGCGAATCACGCTCCGTAGCCCCCTAGATGTGCACTGGGAGACAGACAAATCTCCCTATGTATGGCTATAGTCTAAATTTTTCACAAAATTTCAG…				dsRNAs are not insecticidal, but meant to protect bees from Israeli acute paralysis virus; cytochrome p450 9e2 hits at 17/17		11	2	no	nuclear factor 1 A-type isoform, caveolin-3-like isoform, venom dipeptidyl peptidase 4 isoform, DNA fragmentation factor subunit beta-like, nicotinic acetylcholine receptor alpha6 subunit, mitochondrial import inner membrane translocase subunit TIM50-C-like, polypyrimidine tract-binding protein 1, SIFamide receptor, MAX dimerization protein, discoidin domain-containing receptor 2 isoform, ankyrin…		13	1	2	0	10
55	Maori et al. 2009	Insecta	Hymenoptera	Apidae	Apis mellifera	IAPV 2	426	ACACAATTCTTGAAATGCCAAACTGGTGTCGAGGAGGACTTGACATTCAAGAAGGTACAAAGTTGAATTGTGAAAATGCAATTATGGAGCTTTCCATGCATGAAGAGAGCGTTTTTAATACCTGGTCTAAAATAATTGACCGAGTATATGCAAATGCGACTGGAGATCACCTGGACATAAACACTTATCGTGGTTATGCTCAGGAGCGGTTTCTGGAATACTATATGTAAGTATAGTGTTCTGGAGGCATCATTCTATGGTTACCCATCATTAGAGGAAATTTCCAATAAACTCTGGTGTAAGGCTTAGAGTGATGGTCGAGGTGCCCTATTTAGGGTGAGGAGCCTCGGTGGCAGCCCCACCAAATCCTCTATTGGATAGGAACAGCTGTACTGGGCA…						17	4	no	clarin-3-like isoform, tetratricopeptide repeat protein 4, neurexin 1 precursor, facilitated trehalose transporter Tret1-2 homolog isoform, kinesin-like protein KIF20B-like, homeobox protein cut isoform, dedicator of cytokinesis protein 7-like, tensin-1 isoform, inositol 1,4,5-trisphosphate receptor isoform, probable 4-coumarate--CoA ligase 3-like isoform, monocarboxylate transporter 3-like, tyro…		21	6	2	1	13
56	Gen Bank	Saccharomycetes	Saccharomycetales	Saccharomycetaceae	Saccharomyces	Snf7	939	TTCGAATCATGAATAGTTGGCAGAGCAGGGGAAGTACGAGCTTCTAAAGGGTAAGATATTGTATTTCGGACGGAAGCAGCAGAAACATAACAGTATTGATAAATAAGGCATGTGGTCATCACTTTTTGGTTGGACATCAAGTAATGCCAAGAATAAAGAGTCACCAACAAAGGCCATAGTGCGGTTGAGGGAGCATATCAACCTTCTATCCAAAAAGCAATCGCATTTACGTACTCAAATTACAAATCAAGAGAATGAAGCTAGAATCTTTTTGACGAAGGGCAATAAAGTAATGGCGAAGAATGCACTTAAAAAGAAGAAGACAATCGAACAACTTTTAAGTAAGGTAGAAGGCACAATGGAGTCTATGGAACAGCAGCTATTCTCTATAGAAAGTGC…						41	8	yes	autism susceptibility gene 2 protein-like isoform, myogenic-determination protein, chemosensory protein 5 precursor, WD repeat-containing protein 87-like, neuropeptide Y receptor-like isoform, putative gustatory receptor 28b-like, scavenger receptor class B member 1 isoform, LIM domain-binding protein 2-like isoform, homeobox protein Nkx-6.1-like, netrin-1-like isoform, latrophilin Cirl-like isof…		49	9	4	2	40
57	Yao et al., 2013	Insecta	Hemiptera	Delphacidae	Peregrinus maidis	vATPase B	420	AACGGCTCCATCACTCAGATTCCCATTCTAACTATGCCCAACGATGATATTACACATCCCATTCCCGATTTGACGGGATACATCACAGAAGGACAAATCTACGTAGACAGACAATTGCAGAACAGACAGATCTACCCACCAGTGAATGTGCTGCCTTCTCTCAGTCGATTGATGAAATCTGCTATTGGAGAAGGCATGACCCGCAAGGACCACAGTGATGTGTCCAACCAACTGTACGCTTGCTATGCTATTGGCAAGGATGTTCAGGCCATGAAAGCTGTCGTCGGAGAAGAAGCATTGACACCTGATGACTTGCTCTACTTGGAATTCTTGACCAAGTTCGAGAAGAATTTCATTTCACAAGGAAACTATGAGAACAGAACTGTTTTCGAATCACTG…						13	1	yes	regulating synaptic membrane exocytosis protein 1-like isoform, CCR4-NOT transcription complex subunit 7-like isoform, BTB/POZ domain-containing protein KCTD15-like isoform, probable serine/threonine-protein kinase CG32666-like isoform, DNA polymerase theta isoform, exocyst complex component 7, Krueppel-like factor 6-like isoform, mitochondrial inner membrane protein OXA1L-like, V-type proton ATP…		14	1	4	0	8
58	Yao et al., 2013	Insecta	Hemiptera	Delphacidae	Peregrinus maidis	vATPase D	447	ATCCAGAGGAGCCCAAACTTTAATGAAAAGTCGTCTGAAAGGTGCTCAGAAAGGACACAGTCTGTTGAAAAAGAAAGCAGATGCCTTACAGATGAGATTCCGTTTGATTCTCTCCAAAATCATAACTACGAAGTCCTTGATGGGCGAAGTAATGAAAGAGGCCGCGTTCTCTCTCGCTGAGGCGAAGTTCACCACCGGAGACTTCAATCAAGTTGTACTTCAAAATGTGACTAAGGCCCAGATAAAAGTTCGCACAAAGAAGGACAACGTTGCTGGTGTGACGCTGCCAGTTTTCGAAAGCTATCAAGACGGAACGGACACTTACGAACTGGCTGGTCTTGCCAGGGGTGGTCAGCAGTTGGCTAAACTGAAAAAGAACTATCAGAGTGCTGTTAAACT…				does target vATPase of honey bee, but not to level of specificity required		19	1	no	chymotrypsin-1, transcription factor AP-2-epsilon, kazrin, formin-binding protein 1 homolog isoform, heparan sulfate 2-O-sulfotransferase pipe-like isoform, calcium/calmodulin-dependent 3',5'-cyclic nucleotide phosphodiesterase 1C isoform, semaphorin-2A isoform, 2-oxoglutarate and iron-dependent oxygenase domain-containing protein 3 like, serine/threonine-protein kinase ICK-like isoform, leucine-…		20	4	2	1	14
59	Chu et al., 2014	Insecta	Coleoptera	Chrysomelidae	Diabrotica virgifera	DvRS5 (cysteine protease)	673	GCCAATCTAGGTGCCTTCGAAAAATGGACTAGTTTTAAGGCCACCCATAACAAATCTTACAACGTTATTGAAGACAAACTTCGTTTCGCTGTTTTCCAAGAGAACCTCAAAAAAATCGAGGAACACAATGCTAAATACGAAAGTGGAGAAGAAACCTACTATTTGGCTGTTAACAAATTCGCCGATTGGTCCAGCGCTGAATTCCAAGCTATGTTGGCCCGTCAAATGGCTAACAAGCCAAAACAAACCTTCATTGGAAAACACGTAGAAGATCCCAATGTCCAAGCTGCAGATGAAGTTGATTGGAGATCAAGCGCTGACTTGGGAGTCAAGGATCAAGGAAACTGTGGATCATGCTGGGCTTTCAGTACCACCGGATCCCTCGAAGGTCAACTCGCC…						32	2	no	glutamyl aminopeptidase-like isoform, CCAAT/enhancer-binding protein, proteasome subunit beta type-5-like, connectin isoform, flocculation protein FLO11-like isoform, neuronal growth regulator 1-like, protein bric-a-brac 1-like, probable G-protein coupled receptor Mth-like 1-like, TSC22 domain family protein 1-like isoform, dopamine receptor 2, retinoblastoma-family protein isoform, actin-related…		34	2	8	0	24
60	Chu et al., 2014	Insecta	Coleoptera	Chrysomelidae	Diabrotica virgifera	att1	552	ATCAGTTCAATTGCAGCTTCAACATAATTGAAAACAAAAGCTAGATTTTACAATGAAAGGTATAGCTATCATTGCTTTATGCATTTCCGCAGTAGTATCTCTTCCTTTGAATGTCATTGAAGATGAAAGCGGACAAGAGTATGTTTTACTTCCAGTACATAGAGAAAGAAGAGACTTAACGTGGGGCGCCAACCAAAATGGATACACTCTTGGTCAAAAAGGAAATATCTGGGAAAATGGTGCACACAAATTTGACGGTGCTTACACTGGTTCGAAAGCTTGGGATTCTCATGGACTGAAACCAGATTCTTTTGGAGGTCGTGTAGAATACACTAATAAACCAACAAAAACTACGGCCTTTGTAGGCGCAGACAGGACCCCCGGATATGGTACTGATGT…						38	1	no	slit homolog 1 protein-like, LIM homeobox transcription factor 1-beta.1-like isoform, proton-coupled amino acid transporter 1-like isoform, calponin homology domain-containing protein DDB_G0272472-like isoform, A-kinase anchor protein 9-like isoform, glutamate receptor ionotropic NMDA 2B isoform, microtubule-associated protein futsch-like isoform, discoidin domain-containing receptor 2-like isofo…		39	5	5	1	28
61	Petrick et al., 2015	Mammalia	Rodentia	Muridae	Mus musculus	vATPase	218	GCUCAGCGCAAGCACUUCCCCUCUGUCAACUGGCUCAUCAGCUACAGCAAGUACAUGCGUGCCCUGGACGAGUACUAUGACAAGCACUUCACGGAGUUUGUUCCUCUGAGGACCAAAGCUAAGGAGAUCCUGCAGGAAGAAGAGGAUCUGGCAGAAAUCGUGCAGCUCGUGGGAAAGGCCUCUUUAGCAGAGACGGAUAAAAUCACUCUGGAGGUAGC				does target vATPase of honey bee, but not to level of specificity required		4		no	dentin sialophosphoprotein-like isoform, homeobox protein Nkx-2.5-like isoform, microtubule-associated protein futsch isoform, neurobeachin-like,		4	2	0	1	2
62	Petrick et al., 2015	Mammalia	Rodentia	Muridae	Mus musculus	vATPase	21	GGACCAAAGCUAAGGAGATCC								no	no		0
63	Petrick et al., 2015	Mammalia	Rodentia	Muridae	Mus musculus	vATPase	21	UCGUGCAGCUCGUGGGAAAGG								no	no		0
64	Petrick et al., 2015	Mammalia	Rodentia	Muridae	Mus musculus	vATPase	21	UCAACUGGCUCAUCAGCUACA								no	no		0
65	Petrick et al., 2015	Mammalia	Rodentia	Muridae	Mus musculus	vATPase	21	UGGACGAGUACUAUGACAAGC								no	no		0
66	Yu et al., 2014	Insecta	Hemiptera	Delphacidae	Nilaparvata lugens	NlEcR	360	ACTTCCAGAACGAATTCGAGCACCCGAGCGAGGAGGACCTGAAGAGGATTGGATGTTTGAATCTACCCAGTCAGGTGGCCCAAGACCAGCAGGCGGAGAGCGACATGAGATTCCGTCACATAACAGAAATCACCATTTTGACAGTGCAGCTGATTGTCGAATTCGCCAAACGACTGCCCGGCTTCGACAAACTACTCAGAGAGGACCAGATTGTACTGCTCAAGGCATGTTCCAGCGAAGTGATGATGCTTCGCACGGCCAGAAAGTACGACGTGAACACAGACTCTATCCTGTTCGCCAACAACCAGCCCTACACGAGGGACTCCTACACGCTGGCGGGCATGGGTTATGTGGTGGAGG						4	1	yes	ecdysone receptor isoform, failed axon connections isoform, photoreceptor-specific nuclear receptor isoform, probable tyrosine-protein phosphatase F54C8.4-like, putative gustatory receptor 28b-like,		5	2	1	0	3
67	Miyata et al., 2014	Insecta	Coleoptera	Chrysomelidae	Diabrotica virgifera	laccase 2	500	TGTGCCATTTGTTACGCAGTGCCCCATTCAACAAGGAAATACATTTAGATATCAGTGGTTAGCTGGCAATGCTGGTACACACTTCTGGCACGCCCATACAGGATTACAGAAGATGGATGGTCTATACGGCAGCATTGTTATCCGTCAACCTCCTTCTCACGATCCCAATAGCCATCTGTACGACTATGATCTCACCACTCATGTAGTTCTCATAAGTGACTGGATGCACGAAGCAGCCGCGGAAAGATTCCCAGGAAGACTGGCGGTAAATACTGGACAAGATCCTGAAAGCTGCTTGATTAACGGAAAAGGACAATTCAGAGACCCCAACACTGGCTTTATGACCAATACACCTTTGGAAGTTTTCACCATCACTCCTGGCAAAAGGTACAGGTTCAG…						8	1	yes	actin cytoskeleton-regulatory complex protein PAN1-like, cuticular protein 27 precursor, dipeptidase 1-like isoform, nicotinic acetylcholine receptor alpha1 subunit, DNA ligase 1-like isoform, fat-like cadherin-related tumor suppressor homolog isoform, serine/threonine-protein phosphatase 4 regulatory subunit 1 like isoform, laccase 1		9	1	1	0	6
68	Miyata et al., 2014	Insecta	Coleoptera	Chrysomelidae	Diabrotica virgifera	laccase 2	300	ATGTAGTTCTCATAAGTGACTGGATGCACGAAGCAGCCGCGGAAAGATTCCCAGGAAGACTGGCGGTAAATACTGGACAAGATCCTGAAAGCTGCTTGATTAACGGAAAAGGACAATTCAGAGACCCCAACACTGGCTTTATGACCAATACACCTTTGGAAGTTTTCACCATCACTCCTGGCAAAAGGTACAGGTTCAGAATGATCAACTCATTTGCTTCAGTTTGTCCCGCTCAATTGACAATCCAGGGTCATGACTTAACGCTCATCGCTACCGACGGTGAACCAGTGCAACCAGTCA						4		yes	DNA ligase 1-like isoform, fat-like cadherin-related tumor suppressor homolog isoform, serine/threonine-protein phosphatase 4 regulatory subunit 1 like isoform, laccase 1		4	1	1	0	2
69	Miyata et al., 2014	Insecta	Coleoptera	Chrysomelidae	Diabrotica virgifera	laccase 2	250	CCAGGAAGACTGGCGGTAAATACTGGACAAGATCCTGAAAGCTGCTTGATTAACGGAAAAGGACAATTCAGAGACCCCAACACTGGCTTTATGACCAATACACCTTTGGAAGTTTTCACCATCACTCCTGGCAAAAGGTACAGGTTCAGAATGATCAACTCATTTGCTTCAGTTTGTCCCGCTCAATTGACAATCCAGGGTCATGACTTAACGCTCATCGCTACCGACGGTGAACCAGTGCAACCAGTCA						4		yes	DNA ligase 1-like isoform, fat-like cadherin-related tumor suppressor homolog isoform, serine/threonine-protein phosphatase 4 regulatory subunit 1 like isoform, laccase 1		4	1	1	0	2
70	Miyata et al., 2014	Insecta	Coleoptera	Chrysomelidae	Diabrotica virgifera	laccase 2	150	CACCTTTGGAAGTTTTCACCATCACTCCTGGCAAAAGGTACAGGTTCAGAATGATCAACTCATTTGCTTCAGTTTGTCCCGCTCAATTGACAATCCAGGGTCATGACTTAACGCTCATCGCTACCGACGGTGAACCAGTGCAACCAGTCA						1		yes	laccase 1		1	0	0	0	1
71	Miyata et al., 2014	Insecta	Coleoptera	Chrysomelidae	Diabrotica virgifera	laccase 2	100	ATGATCAACTCATTTGCTTCAGTTTGTCCCGCTCAATTGACAATCCAGGGTCATGACTTAACGCTCATCGCTACCGACGGTGAACCAGTGCAACCAGTCA						1		yes	laccase 1		1	0	0	0	1
72	Miyata et al., 2014	Insecta	Coleoptera	Chrysomelidae	Diabrotica virgifera	laccase 2	50	TCATGACTTAACGCTCATCGCTACCGACGGTGAACCAGTGCAACCAGTCA								no	no		0
73	Miyata et al., 2014	Insecta	Coleoptera	Chrysomelidae	Diabrotica virgifera	laccase 2	30	CTACCGACGGTGAACCAGTGCAACCAGTCA								no	no		0
74	Miyata et al., 2014	Insecta	Coleoptera	Chrysomelidae	Diabrotica virgifera	ebony	500	TGGCAGTTTAGAAGATTCCCTTATAGCCCTTCCGAGAAAGTATGTGTTTTCAAAACAGCTCTAACATTCGTTGACAGCATAGCGGAAATTTGGGGACCACTATTGAATGGAAGGGCTATTCTCGTGATTCCAAAGTCGGTTACTAAAGATCCAGAAACATTTGTTTCTGTTTTGGAAAACTATAAGATTGAGCGGTTAATTTTGGTACCCTCACTTTTAAGAAACCTTCTTATGTTTTTACAAATGAGAAAAGAAGATTTGTTACTCAGAAATTTAAAGACATGGGTCTGTTCGGGAGGAACCCTTGTAGTTTCTTTGGTCGAAGAGTTTTTCAAGTACTTTCCTCCAAACGAGTACCAGCTTTGCAACTTTTACGGCAGCACCGAAATAATGGGCGAC…					2	40	8	yes	CUGBP Elav-like family member 2-like isoform, LIM domain transcription factor LMO4.2-like isoform, leucine-rich repeat-containing protein 24 isoform, carbonic anhydrase-related protein 10-like isoform, neuronal growth regulator 1-like, protein bric-a-brac 1-like, flotillin-2 isoform, dual 3',5'-cyclic-AMP and -GMP phosphodiesterase 11-like isoform, zinc finger protein 484-like isoform, longitudin…		50	6	11	2	34
75	Miyata et al., 2014	Insecta	Coleoptera	Chrysomelidae	Diabrotica virgifera	ebony	250	TGGCAGTTTAGAAGATTCCCTTATAGCCCTTCCGAGAAAGTATGTGTTTTCAAAACAGCTCTAACATTCGTTGACAGCATAGCGGAAATTTGGGGACCACTATTGAATGGAAGGGCTATTCTCGTGATTCCAAAGTCGGTTACTAAAGATCCAGAAACATTTGTTTCTGTTTTGGAAAACTATAAGATTGAGCGGTTAATTTTGGTACCCTCACTTTTAAGAAACCTTCTTATGTTTTTACAAATGAGAA						16	4	no	CUGBP Elav-like family member 2-like isoform, LIM domain transcription factor LMO4.2-like isoform, leucine-rich repeat-containing protein 24 isoform, carbonic anhydrase-related protein 10-like isoform, neuronal growth regulator 1-like, protein bric-a-brac 1-like, flotillin-2 isoform, dual 3',5'-cyclic-AMP and -GMP phosphodiesterase 11-like, zinc finger protein 484-like isoform, longitudinals lack…		20	3	5	1	12
76	Miyata et al., 2014	Insecta	Coleoptera	Chrysomelidae	Diabrotica virgifera	ebony	150	TGGCAGTTTAGAAGATTCCCTTATAGCCCTTCCGAGAAAGTATGTGTTTTCAAAACAGCTCTAACATTCGTTGACAGCATAGCGGAAATTTGGGGACCACTATTGAATGGAAGGGCTATTCTCGTGATTCCAAAGTCGGTTACTAAAGAT						1	1	no	CUGBP Elav-like family member 2-like isoform, LIM domain transcription factor LMO4.2-like isoform		2	0	1	0	1
77	Miyata et al., 2014	Insecta	Coleoptera	Chrysomelidae	Diabrotica virgifera	ebony	100	TGGCAGTTTAGAAGATTCCCTTATAGCCCTTCCGAGAAAGTATGTGTTTTCAAAACAGCTCTAACATTCGTTGACAGCATAGCGGAAATTTGGGGACCAC						3		no	probable serine/threonine-protein kinase dyrk2-like, spliceosome-associated protein CWC15 homolog isoform, dedicator of cytokinesis protein 9-like isoform,		3	1	1	0	1
78	Miyata et al., 2014	Insecta	Coleoptera	Chrysomelidae	Diabrotica virgifera	argonaute 2	250	TCGGCAAGTACATGAAGCAGTTAAGAGTTGTTTATGAAATTCCAAATTTGCCCAGTTCTAGAAGAAGTTATAAGGTTAACGGTATAAATGACCCACCGGCCGTGAAAACCTTTAAAGATGCGAATAATAGAGAAATTACCATCCAACGGTATTTTGAAACAGAAAAAAGGTGCAAATTAAGATATCCTCAGATGCCGACACTATGGGTCGGATCTTCAGCTAGATCGGATAATCCTATACTTGTACCTAT						15	5	no	POU domain, class 6, transcription factor 2 isoform, homeobox protein H9, ultrabithorax isoform, probable glucosamine 6-phosphate N-acetyltransferase-like, glutaminase kidney isoform, mitochondrial isoform, kin of IRRE-like protein 1-like isoform, adult-specific cuticular protein ACP-22, solute carrier family 23 member 1-like, protein amnionless-like, zinc finger and BTB domain-containing protein…		20	3	2	1	15
79	Miyata et al., 2014	Insecta	Coleoptera	Chrysomelidae	Diabrotica virgifera	dicer 2	250	GGTTGCACACGTATCTGCTCATGATGAATATGCAGCTGCAAAAACTAATAGATAGGTTCGATAACTTCATGGCCCAAAAGAACTATATAATAGATGATGAAGTTTTGATATTACTCCAGGAGGATGAATACCAACTGGCAGAATCGGTAGATGTACCTAAGGTACTTGGTGATATTTTCGAAGCAGTAGCTGGTGCTATTTATTTGGATAGTAAAAAATGTCTGAAAACGGTGTGGGAAGTGTTTTATAA						38		no	transient receptor potential channel pyrexia-like, ubiquinone biosynthesis monooxygenase COQ6-like isoform, semaphorin-2A isoform, poly(A) polymerase alpha isoform, immunoglobulin-like and fibronectin type III domain containing 6 isoform, acyl-CoA synthetase family member 2 mitochondrial precursor, roundabout homolog 2 isoform, DNA polymerase alpha catalytic subunit-like, fibroblast growth factor…		38	4	4	0	29
80	Miyata et al., 2014	Insecta	Coleoptera	Chrysomelidae	Diabrotica virgifera	sil c	250	AGGCACAAATGGCGAAACAAATGAAAATTATACATCTAGAACTATGTGCCATGATATTATTAAACAATATAGATTTGCAGGAAGTAAACAGAAATTAAAACAAGAGAATGTCATTGTTTCTGTTACTACCTCATCAGTAACCAATGTAAGCTTCACTATAAGGGTAGACAATCAAAAGGATTTTACTCTGGAATTAAATAAAGAAATAGAGTTTGACATTACTCCAAGCGGACCAAGATACTTTTTCTAC						5		no	histidine-rich glycoprotein-like, polypyrimidine tract-binding protein, m7GpppX diphosphatase-like isoform, ribonuclease H2 subunit A-like, protein FAM13B-like isoform,		5	0	0	0	5
81	Miyata et al., 2014	Insecta	Coleoptera	Chrysomelidae	Diabrotica virgifera	sil a	250	GCATTGTCAACGGCGAGCACAACTGATGTAAACGTAACTGTGGAATTGAAAGAAGAGCCGGATTTTTACCTAATACAAGATAAACCGTATAACATGACGGTGGGACCCAGTGAGCCAAGATATGCTTATTTCAGATTCGAAAAGGACACTGCTGACACGGTCGTCATCGAAGTAGATTCAGAAGACGAACTCTGTCTTACAATTTCTGTCCAGGACAGCAAGTGCCCGGTTTTTGACAATAACAAAGATG						11	3	no	histone-lysine N-methyltransferase EHMT1-like isoform, voltage-dependent calcium channel type A subunit alpha-1, mannosyl-oligosaccharide alpha-1,2-mannosidase isoform, calcium/calmodulin-dependent 3',5'-cyclic nucleotide phosphidiesterase 1C isoform, UPF0489 protein C5orf22 homolog isoform, myosin regulatory light chain sqh-like isoform, protein couch potato-like isoform, zinc finger protein rot…		14	0	0	0	14
82	Desai et al., 2012	Insecta	Hymenoptera	Apidae	Apis mellifera	DWV	790	TTTGCAAGATGCTRTATGTGGTGTGCCTGGTTTAGATGGGTTTGATTCGATATCTTGGAATACTAGTGCTGGTTTTCCTTTGTCTTCATTAAAGCCACCTGGAACATCAGGYAAGCGATGGTTGTTTGAYATTGAGCTACAAGAYTCGGGATGTTATCTCYTGCGTGGAATGCGTCCCGAACTTGAGATTCAATTATCAACGACACAGTTAATGAGGAAAAAGGGAATAAAACCTCACACTATATTCACGGATTGTTTGAAAGATACTTGTTTGCCTGTTGAAAAATGTAGAATACCTGGTAAGACTAGAATATTTAGTATAAGTCCGGTACAGTTTACCATACCGTTTCGACAGTATTACTTAGACTTTATGGCATCCTATCGAGCTGCACGACTTAA…				dsRNA designed to protect bees from DWV		24	1		knirps-related protein isoform, nephrin isoform, nicotinic acetylcholine receptor alpha8 subunit, heparan sulfate 2-O-sulfotransferase pipe-like isoform, diacylglycerol kinase theta-like isoform, serotonin receptor, CUGBP Elav-like family member 2-like isoform, poly(A) polymerase alpha isoform, elongation of very long chain fatty acids protein AAEL008004-like isoform, Down syndrome cell adhesion …		25	2	4	0	19
83	Kelkenberg et al., 2015	Insecta	Coleoptera	Tenebrionidae	Tribolium castaneum	TcCHS2-1	315	GTACGTACAAGGCCGATAACAAGGAAAACGAGCAGTTGAGGAAAATACAAGAGTCGTTGAGAGACTTGAATAGGAAAATCGAGTCGCTGGAAAAAATGCAATATCCGGATTTGAGGTCTCCTGCCGTTAGCAACGTTACAACGTTCATGGAGGGCTCAAAGGCGACGGTTAAGAACAACGTGGAGGATAACTACATGGAGGCTCCGCAAGACAATGTTTCGCAACCGTCGGATGAGGTCATGGAGAATAGTTGGTTCTACGATGGGCCTTTGATTAGGGGGGAAGTGCATTACTTGAATAGGAATGAGGAAACGT						16	3	no	histone-lysine N-methyltransferase EHMT1-like isoform, voltage-dependent calcium channel type A subunit alpha-1, lateral signaling target protein 2 homolog isoform, golgin subfamily B member, mitochondrial inner membrane protein OXA1L-like, glycerol-3-phosphate acyltransferase 1 mitochondrial-like, nucleolar complex protein 3 homolog, sodium/hydrogen exchanger 3 isoform, transcription initiation …		19	2	1	0	16
84	Han et al., 2014	Insecta	Lepidoptera	Plutellidae	Plutella xylostella	PxSp2	686	GAGTTCAGCGCCAGCTCCCGAGGCACCTACAGGAGCGAGATCGAGAACTTGAAGTTCACTGAGCCCAGCAAGGCCGCTGCTGTTATCAATGAATGGGCAGAGAAAGAAACCCATGGAAACATCAAGAACGCCGTCAGCCCTGACGCCCTGAGCCCTGACGTCGCTGTAGCCATGTTCAACGTCATTACTTCAAGGGCCAATGGGAGTACCCGTTCACGAAGGAAAGAGACGAAAGAGAAGGACTTCCACCTGTCCAAGGACAAGACGGTGAAGAAGAGCATCATGCACGTCATGAAGAACTTCCGCTACCACGACAGCGAGCTGCTCGGGGCTCAGCTGGCTGAGCTTCCATACCAAGAAGAAGGGTTCCGCATGATCGTCGCTCTGCCGCACGAGGTG…					2	37	11	yes	glutamate receptor ionotropic NMDA 2B isoform, knirps-related protein isoform, pikachurin-like isoform, homeobox protein homothorax-like isoform, dentin sialophosphoprotein-like, GRB2-associated-binding protein 2, 28S ribosomal protein S29 mitochondrial isoform, GS homeobox 1-like, syndecan isoform, disintegrin and metalloproteinase domain-containing protein 10 isoform, titin-like, tyrosine amino…		50	6	8	3	37
85	Han et al., 2014	Insecta	Lepidoptera	Plutellidae	Plutella xylostella	PxSp4	560	GTTTGCAAAACAGTTTTAAATTAAAAAAATCCTCCATGCTGCAGAAAAGTTTCTAAAAGTTTAATAATTAGTGCAGTGCTGTGAAGTGAAAAGTAACAAAATGTGGCGGTTAATAAGCCTAGTGACCTTATTATGTGTGTGTTCAAGCTTCGGACAACAACCAGTGGAGACCACTACTCCACCTTATTCGCTGGAGCTTCATGAAGGCCTGTCACAGAGCATAGGGAATTTCTCCGTGGAGATTCTGTATCATACAGCGGTCTCCAGTCTAATGGCAAACAAAAACCTTGTGATATCGCCACTAACCATGTGGATTGCTTTAGCGGTGACAAATGAAGGGGCGGATGGAAGAACGTCTAAGCAAATAAAAGATGCAATCAGGAGCCCGATCAAAAAGGA…						20	2	no	calcium/calmodulin-dependent 3',5'-cyclic nucleotide phosphodiesterase 1C isoform, polypeptide N-acetylgalactosaminyltransferase 2-like isoform, dynein light chain 1 axonemal-like, mushroom body large-type Kenyon cell-specific protein 1 isoform, adenylate cyclase type 5-like, mediator of RNA polymerase II transcription subunit 22, glycogen-binding subunit 76A-like isoform, protein FAM69C-like iso…		22	3	4	1	15
86	Han et al., 2014	Insecta	Lepidoptera	Plutellidae	Plutella xylostella	PxSp5	667	CAAAACCAGAAATCTCGGTAAGCACCAACAGTTACATTTTTTATGATAATGTTGTACCAGTTGAAAGAGATTTCATGGGTACGCTCGAAAGGGACTTCAAAACTGTTGTTAATCAGATCTCGCCAGATAATTGGACAGCTACAGATGTTATTGTTAATGATATAAAGAAATCGCAAACACACGCTGTTAATGTGATAAACTTAAGCAATCTTCAAGGTGCTGTTACAATGAGAGCTATCAACTTTATATCATTTGAAGGCCTATGGGGTGTGCCTTTTGATAAACGAGATACAGCCGTCAACAATTTCTATAACGATCAGGGGGAATTAATAGGAGAAGTCAACATGATGCATCAAAAAGGACCTTTCCAGTTTACTGACATTAAAGAATTGGAGGCAG…						59	4	no	octopamine receptor beta-1R isoform, non-structural maintenance of chromosome element 4-like isoform, protein Star-like, proton-coupled amino acid transporter 4-like isoform, Krueppel-like factor 7-like, plexin-A4 isoform, putative GTP-binding protein 6-like isoform, meiosis-specific nuclear structural protein 1-like, transcriptional activator cubitus interruptus isoform, translation machinery-as…		63	8	9	0	44
87	Ochoa-Campuzano et al., 2013	Insecta	Coleoptera	Chrysomelidae	Leptinotarsa decemlineata	prohibitin-1	351	AGGTCAGGACTACGAAGAAAGAGTACTACCATCGATCACCACTGAAGTTCTCAAAGCCGTAGTAGCTCAGTTTGACGCAGGAGAACTGATCACCCAGCGTGACTTGGTATCACAAAAAGTCAGTGATGATCTGACAGAAAGAGCGGGACAATTTGGTGTGATCCTAGACGACATTTCTTTAACACATTTAACATTCGGTAGAGAGTTTACACAGGCTGTTGAACTGAAACAAGTTGCACAACAGGAAGCAGAAAAAGCTAGATTCTTGGTAGAGAAGGCAGAACAGACCAAAAAAGCAACAATTCTCTCAGCTGAAGGTGATGCCCAAGCTGCTATTCTGTTGGCCAAAGC						21	4	no	thyrotropin-releasing hormone receptor isoform, protein l(2)37Cc-like isoform, microtubule-associated protein futsch-like isoform, histamine-gated chloride channel 1 precursor, RNA-binding protein squid-like isoform, carboxylesterase 5A, serine/threonine-protein kinase SBK1-like isoform, fat-like cadherin-related tumor suppressor homolog isoform, transmembrane and TPR repeat-containing protein 1-…		25	2	6	0	16
88	Meng et al., 2013	Insecta	Lepidoptera	Noctuidae	Spodoptera litura	SLAWD	537	ATGATTGCCACTTTGCTATACCTTGTAATCCATCTCAGACGCGCCGGCTACACGTTAATAAAAGTCATAATGGCGGAACAACGTGAAAGAACTTTCCTCATGATTAAACCTGATGGTGTCCAACGTGGACTTGTTGGCACCATTATCGAACGGTTTGAGAAGAAAGGATTCAAGTTAGTCGGCCTCAAATTCATGTGGCTGTGGCCCTCAGAAGAGTTGCTTCAGAAACATTACAGCGATTTATCGTCCAAGCCCTTCTTCCCTGGTCTAGTGAAATACATGAGCTCTGGACCCGTAGTTCCCATGGTATGGGAGGGCCTGAACGTCGTGAAAACCGGCCGTCAGATGCTTGGAGCTACAAACCCAGCTGACTCACAACCCGGCACTATTCGTGGCGAT…					1	23	1	no	arrestin domain-containing protein 2 isoform, putative polypeptide N-acetylgalactosaminyltransferase 9-like isoform, cell wall protein AWA1-like isoform, midasin-like, neuronal PAS domain-containing protein 4 isoform, pre-rRNA processing protein FTSJ3-like isoform, ecdysone-induced protein 75 isoform, nucleoside diphosphate kinase, catenin delta-2-like isoform, bifunctional methylenetetrahydrofol…		25	4	5	1	17
89	Kwon et al., 2013	Arachnida	Trombidiformes	Tetranychidae	Tetranychus urticae	β subunit of coatomer protein complex	513	TTCGGGAATCTACAACGTTGCGTTCCTTTCATATTTTATTTTGGGTGATAAAGAAAAAGCTTTGAATCTTTTAATCGACACTAACCGGCTTCCCGAGGCTGCATTCTTCGCACGAACCTACCTTCCATCTCATGTACCTAGAGTAGTTAAATTATGGAAAGAAAATGTAATATCGAAAAATGAAAAATTCGCTCAAGCCTTGGCTGATCCCACCGAATATGAAAACCTGTTTCCCAATTTCCAAGACACCTTGTTGGCTGAACAGTATTTAAATGAACAAAGTAAATCAGGCCGACCAAAGGCAACAGATTATCCAACCATTCAAACTAATGAAGATCGAGATCCAATCGAAGAAACTCGAGAAGCACTAGAATCTGGATTATTTGTTAAGAAACCATT…						71	8	no	PAB-dependent poly(A)-specific ribonuclease subunit 2-like, integrin alpha-PS2 isoform, 39S ribosomal protein L44 mitochondrial, flocculation protein FLO11-like, cytoplasmic dynein 2 light intermediate chain 1-like isoform, serine/threonine-protein phosphatase 4 regulatory subunit, coiled-coil domain-containing protein 104-like, protein krueppel, potassium/sodium hyperpolarization-activated cycli…		79	12	8	3	56
90	Kwon et al., 2013	Arachnida	Trombidiformes	Tetranychidae	Tetranychus urticae	M1 metalloprotease	499	AGCTGAAAAATCGATGGAGGTTTCCTTCTTACCGAAAGACGATGAATGGATCATTCTCAATTTACAAGAAGTTGGCTATTACAAGGTGAACTACGACGAAAAAAATTGGTTAATGTTGATTAATCAACTTAAAAAAGATCATAATCGTATTCATGTTCTCAATCGAGCCCAAATTGTTGATGATTTGTTTGATTTGGCTCGTGCTAATATAGTCAACTATTCATTAGCATTGGAAGTTACTCGGTATCTTGTTAATGAAGAAGACTTTGTTCCTTGGGGTTCAGCTTCCAGTGAAATCAGATTTTTGGACTCAATGTTGAGACGAACAAGTCTTTACGGTCGTTGGAAGAGTTATGTTCTGAGTTTAGTTGTAAACAAATACAACAAATTTGGATGGCG…						53	9	no	potassium/sodium hyperpolarization-activated cyclic nucleotide gated channel 1, transcription factor Sox-6 isoform, dosage compensation regulator isoform, TWiK family of potassium channels protein 18-like isoform, histone acetyltransferase Tip, B-cell lymphoma/leukemia 11B-like isoform, fasciclin-2 isoform, mitochondrial genome maintenance exonuclease 1-like, 39S ribosomal protein L40 mitochondri…		62	7	9	3	45
91	Kwon et al., 2013	Arachnida	Trombidiformes	Tetranychidae	Tetranychus urticae	Ribosomal protein S4	510	GACCATTGATCGTACTAAGGACTTCTACAGGATTCTCTACGATGTTAAGGGTCGATTCACACTCCACAGGATTAGACCCGAAGAGGCTACTTACAAATTATGTAAGGTTAAGAGAGTTCAAACTGGACCTAAAGGAGTTCCATTCATTGTTACACACGATGCACGAACCATTCGATACCCTGATCCTTTGATCAAGCCCAATGACTCTGTTAGAATTGATATCGCTACTGGTAAAATCTTGGATTTCTTGAAGTTCGAAACTGGTAATTTATGCATGGTTACTGGAGGACACAATTTAGGTCGAATTGGTACCATCACTTCTAGGGAGAGACATCCTGGTAGTTTTGACATTGTTCATGTCAAGGATTCTCATGGACACAGTTTCGCCACTCGGTTGAA…						21	1	yes	titin, coiled-coil domain-containing protein 22 homolog isoform, 28S ribosomal protein S27 mitochondrial-like, uridine diphosphate glucose pyrophosphatase-like isoform, protein jagged-1 isoform, histone H3.v1-like, protein PFC0760c-like isoform, neurogenic locus Notch protein isoform, trypsin-7 isoform, protein NDRG3-like isoform, N-acetyllactosaminide beta-1,3-N-acetylglucosaminyltransferase lik…		22	1	2	0	21
92	Kwon et al., 2013	Arachnida	Trombidiformes	Tetranychidae	Tetranychus urticae	vATPaseA	482	TACACTCGAGCTCTAGATGAATACTATGAAAGAAATTTCCCAGATTTCGTACCTCTTCGTACTAAGTGTCAACAAATTCTCCAAGAAGAAGAAGATCTTTCAGAAATTGTACAACTTGTTGGTAAAGCTTCACTCGCCGAAGCAGATAAAGTCACATTAGAGATTGCTCGTCTTATCAAAGACGATTTCTTGCAACAAAACAGTTATTCTCCTTATGATAGATTTTGTCCTTTCTGGAAAACATGTGGTATGTTGAAAAACATTATTTCATTTTATGACTTGGCAAAACACGCTATCGAAGCTACCGCTCAAAGTGAGAATCGTATAACATGGTCAATAATTCGTGAAGCTCTTGGTTCAACTATGTATGATTTAAGCTCAATGAAATTCAAGGACCCA…						24	3	yes	POU domain class 6 transcription factor 2 isoform, protein deadpan-like, histone-lysine N-methyltransferase SETMAR-like, proton-coupled amino acid transporter 1-like, V-type proton ATPase catalytic subunit A-like isoform, protein diaphanous isoform, serotonin receptor, rho GTPase-activating protein 7 isoform, connectin isoform, protein kinase shaggy isoform, protein kinase C-binding protein NELL1…		27	2	4	0	22
93	Campbell et al., 2010	Arachnida	Parasitiformes	Varroidae	Varroa destructor	mu-class glutathione S-transferase	495	CAAGTTAAATCTTGCGTTTCCCAACTTACCGTATCTAGTCGATGGCAGTGTCAAACTAAGTCAGAGTCATGCTATTATGAGATACTTGGGACGTAAGTTTAATCTAATTGGCACAACCGAGATTGAGCTAGCTCACTGTGAGCTCGTTGAACAACAGATTGCTGACTTACGCACAGCCTTCATGAAATTGTGTTACAGTCCAAGTTTCGAGCGACTTCAGGAGGGTACATGCTCAAAGGCGGACTGCCTTGGAGTTCTCAATGGCGGATTTATCGATCGCTTTGCACATATGCTTCAAGAGATTTCGGCATTTCTCGGCGAAAGGAAATGGTTCCTAAATGAAAAGTTAACTTACGTTGACTTTCTTGCTTACGAACTTCTTTTTCAAATGTATGTCTG…						15	2	no	protein grainyhead isoform, elongation of very long chain fatty acids protein AAEL008004-like isoform, Down syndrome cell adhesion molecule homolog isoform, probable chitinase 3, alpha-glucosidase precursor, slit homolog 3 protein-like isoform, gastrin-releasing peptide receptor-like, inhibin beta chain-like, syntaxin-17 isoform, serine--tRNA ligase mitochondrial, AP-1 complex subunit mu-1-like i…		17	2	3	0	12
94	Whyard et al., 2009	Insecta	Diptera	Drosophilidae	Drosophila melanogaster	vATPase E subunit	185	AAGGCCCAGATCAATCAGAACGTCGAGCTGTTCATCGACGAGAAAGACTTCCTCTCTGCTGATACCTGCGGTGGTGTTGAGCTGCTGGCCCTCAACGGACGCATCAAGGTGCCCAATACGCTGGAGTCCAGATTAGACCTCATTTCGCAGCAGCTGGTGCCCGAGATTCGTAACGCACTTTTCGG						2		no	probable salivary secreted peptide-like, SAGA-associated factor 29 homolog,		2	0	1	0	1
95	Whyard et al., 2009	Insecta	Coleoptera	Tenebrionidae	Triboleum castaneum	vATPase E subunit	185	AGGGACGCCACTGGTAAAGACGTTCATCTTAAAATCGACGATGAGAGCCACTTGCCATCCGAAACCACCGGAGGAGTGGTTTTGTATGCGCAAAAGGGTAAAATCAAGATTGACAACACCTTGGAGGCTCGTTTGGATTTAATCGCACAGCAACTTGTGCCAGAAATTCGTACGGCCTTGTTTGG						3		no	PDZ domain-containing RING finger protein 4, telomerase Cajal body protein 1, lysine-specific demethylase 6A-like isoform,		3	0	0	0	3
96	Whyard et al., 2009	Insecta	Hemiptera	Aphididae	Acyrthosiphon pisum	vATPase E subunit	185	TTAGCCAACACTGGAATAAACGTCAAAATAAACATTGATAAAAGTATTAAATTACCGACTCAAGAAATAGGAGGCGTCGTGGTCACGTCCAAAGATCGAAGGGTACATGTTGAAAATACGCTTGTAGTGAGATTGCTCTATCTCACCCAACAAGCAATACCAATAATATGCACTGGACTGTTTGG						10	2	yes	venom acid phosphatase Acph-1-like isoform X2, voltage-dependent calcium channel type A subunit alpha-1, MAGUK p55 subfamily member 6 isoform, short-chain dehydrogenase/reductase family 16C member 6-like, myosin light chain alkali-like isoform, poly(rC)-binding protein 4-like isoform, dynein heavy chain 8 axonemal, neuronal growth regulator 1-like, cadherin-87A-like isoform, probable helicase sen…		12	1	0	0	11
97	Whyard et al., 2009	Insecta	Lepidoptera	Sphingidae	Manduca sexta	vATPase E subunit	185	AAGGCCAAGATCAAGAAGGATGTCGTGCTCAAGATCGACAATGAGAACTTCCTTCCCCCTGACACCTGTGGAGGAATTGAGCTGATTGCTGCCAAGGGACGCATCAAGATCAGCAACACGCTGGAGTCGCGCCTGGAGCTGATCGCGCAGCAGCTGCTGCCGGAGATCCGTAACGCGCTGTTCGG						3		no	eukaryotic translation initiation factor 3 subunit M, transmembrane and TPR repeat-containing protein 1-like, male-specific lethal 1 homolog		3	1	0	0	2
98	Hajdusek et al., 2009	Arachnida	Ixodida	Ixodidae	Ixodes ricinus	fer2	243	TATATGCAGATGGCGGCACACTTCGACAACAACAAAGTGGCTCGGAAGGGTTTCAGTACTTTCTTTGCCGAGAACTCCAAAGAGGAACGTGAGCACGCCCAAAAGATCATCGACTACATCAACAAGAGGGGCAGCACCGTCTCGCTCGTCAATATCGACATGCCCCTGATCACCACTTGGAAATCCGTTTTGCAAGCGCTGCGAGATGCCATCAGCTTGGAGAACAAAGTGACCAACAAGCTC						8		no	dentin sialophosphoprotein-like isoform, E3 ubiquitin-protein ligase RNF13-like isoform, homeobox protein homothorax-like isoform, longitudinals lacking protein, dynein heavy chain 2 axonemal, glutamate receptor ionotropic NMDA 2B isoform, LIM domain-binding protein 2-like isoform, headcase protein,		8	2	1	1	5
99	Itakura et al., 2009	Trichonymphida	Teranymphidae	Pseudotrichonympha	Pseudotrichonympha grassii of Coptotermes formusanus	PgEG1a	19	GCTGTCGTACACGGTTGAC								no	no		0
100	Itakura et al., 2009	Spirotrichonymphida	Holomastigotoididae	Holomastigotoides	Holomastigotoides mirabile of Coptotermes formusanus	HmEG1	19	GGTGGGTTCGCGAGTGTAC								no	no		0
101	Itakura et al., 2009	Trichonymphida	Trichonymphidae	Spirotrichonympha	Spirotrichonympha leidyi of Coptotermes formusanus	SlEG1	19	GAGCCTGACGGAGGATATC								no	no		0
